# Supplementary material for: RegioselectiveN1- andN2-heterocycloalkylation ofN1-sulfonyl-1,2,3-triazoles
Source: Royal Society of Chemistry journal article supplement (doi:10.1039/d0qo01111h), 2020-01-01

## *Supporting Information*

# **Regioselective $N^1$ - and $N^2$ -Heterocycloalkylation of $N^1$ -Sulfonyl-1,2,3-Triazoles**

Han Luo,<sup>‡</sup> Zongyuan Tang,<sup>‡</sup> Tao Wang, Yi Tian, Yuan Zhang, You Li, Shanshan Li, Yiliang Gong, and Baosheng Li\*

*School of Chemistry and Chemical Engineering, Chongqing University, 174 Shazheng Street, Chongqing, 400030, P. R. China*

E-mail: libs@cqu.edu.cn

## **Table of Content**

|                                                                                              |     |
|----------------------------------------------------------------------------------------------|-----|
| General Information.....                                                                     | S1  |
| Preparation of substrates .....                                                              | S2  |
| Conditions optimization.....                                                                 | S3  |
| The reaction condition optimization for $N^2$ -heteroalkylations 1,2,3-triazoles .....       | S3  |
| The reaction condition optimization for $N^1$ -heteroalkylations 1,2,3-triazoles .....       | S4  |
| Crude $^1\text{H}$ NMR Spectra of Compounds <b>4a</b> and <b>5a</b> in $\text{CDCl}_3$ ..... | S5  |
| X-ray structure .....                                                                        | S5  |
| General Procedure A: Syntheses of products <b>4</b> .....                                    | S6  |
| General Procedure B: Syntheses of products <b>5</b> .....                                    | S7  |
| Synthetic transformations and applications.....                                              | S7  |
| Transformation of product <b>4a</b> via Keck reaction .....                                  | S7  |
| Synthesis of bioactive compound RAD51 inhibitor.....                                         | S8  |
| Up-scale reaction for product <b>4a</b> .....                                                | S8  |
| Characterization data for compounds.....                                                     | S9  |
| References.....                                                                              | S23 |
| Copies of NMR spectra.....                                                                   | S24 |

## General Information

All solvents were dried or distilled prior to use according to the standard methods unless otherwise noted. THF was distilled over Na/benzophenone and toluene was distilled over Na. Reagents were purchased from commercial sources at the highest commercial quality. TsN<sub>3</sub> was 75% w/w in ethyl acetate solution. All products could be purified by column chromatography using petroleum ether (PE) and ethyl acetate (EA) as eluent. Glassware was dried in an oven before use. All new compounds were characterized by NMR spectroscopy, IR spectroscopy, high-resolution mass spectroscopy (HRMS).

<sup>1</sup>H and <sup>13</sup>C NMR spectra were recorded on Bruker 500 spectrometer (<sup>1</sup>H at 500 MHz and <sup>13</sup>C at 125 MHz). Chemical shifts for <sup>1</sup>H NMR spectra are reported as  $\delta$  in units of parts per million (ppm) downfield from SiMe<sub>4</sub> ( $\delta$  0.00) and relative to the signal of SiMe<sub>4</sub> ( $\delta$  0.00 singlet). <sup>1</sup>H NMR splitting patterns are designated as singlet (s), doublet (d), triplet (t), quartet (q), multiplets (m), doublet of doublet (dd), triplet of doublet (td). Coupling constants are reported as a *J* value in Hz. <sup>13</sup>C NMR spectra are reported as  $\delta$  in units of parts per million (ppm) downfield from SiMe<sub>4</sub> ( $\delta$  0.00) and relative to the signal of chloroform-*d* ( $\delta$  77.00 triplet). <sup>13</sup>C NMR spectra were recorded on the same spectrometer with complete proton decoupling.

Infrared (IR) spectra were measured on Thermofisher Nicolet iN10 FM-IR spectrometer using KBr plates. High resolution mass spectral analysis (HRMS) was performed a Bruker Daltonics APEX II 47e FT-ICR mass spectrometer by using electrospray ionization (ESI) techniques or performed on Bruker solariX 7.0T. Single crystal X-ray diffraction measurements were performed on an Agilent SuperNova-CCD X-ray diffractometer.

Column chromatographic was performed on 200–300 mesh silica gel and reactions were monitored by thin layer chromatography (TLC) using silica gel GF254 plates. Visualisation was by ultraviolet fluorescene ( $\lambda$  = 254 nm) and staining with phosphomolybdic acid.

## Preparation of substrates

$N^1$ -sulfonyl-1,2,3-triazoles **1a**,<sup>1</sup> **1b**,<sup>2</sup> **1c**,<sup>3</sup> **1d**,<sup>4</sup> **1e**,<sup>5</sup> **1f**,<sup>6</sup> **1g**,<sup>2</sup> **1h**,<sup>7</sup> **1i**,<sup>8</sup> **1j**,<sup>9</sup> **1k**,<sup>10</sup> **1l**,<sup>11</sup>

**1m**<sup>12</sup> were synthesized according to literatures.

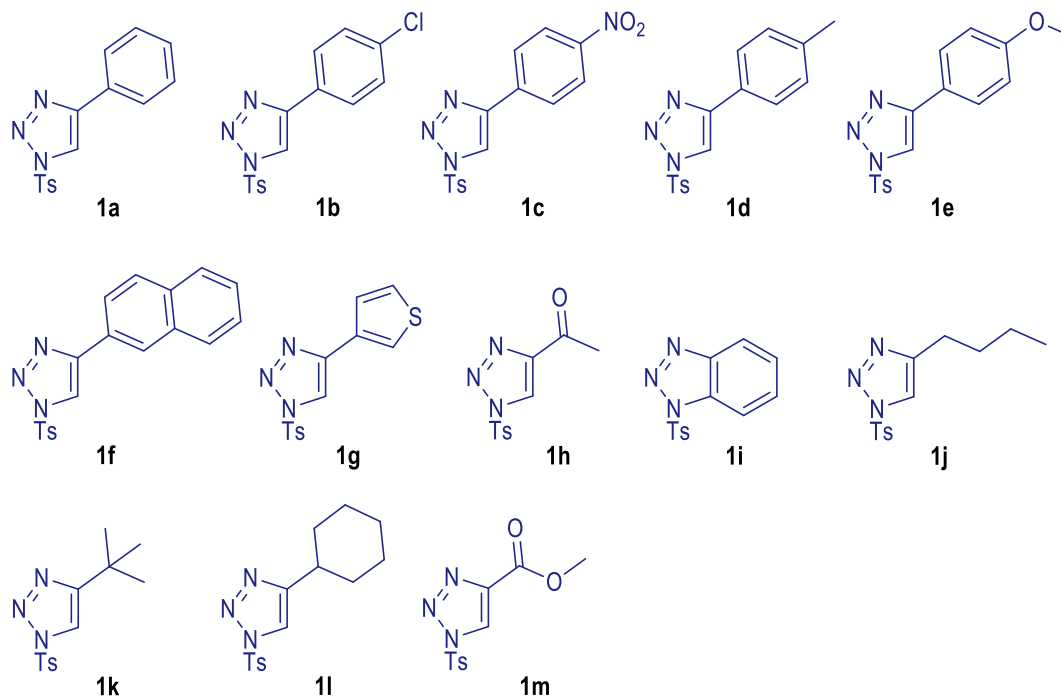

Saturated heterocycles **2a–2i** are commercially available.

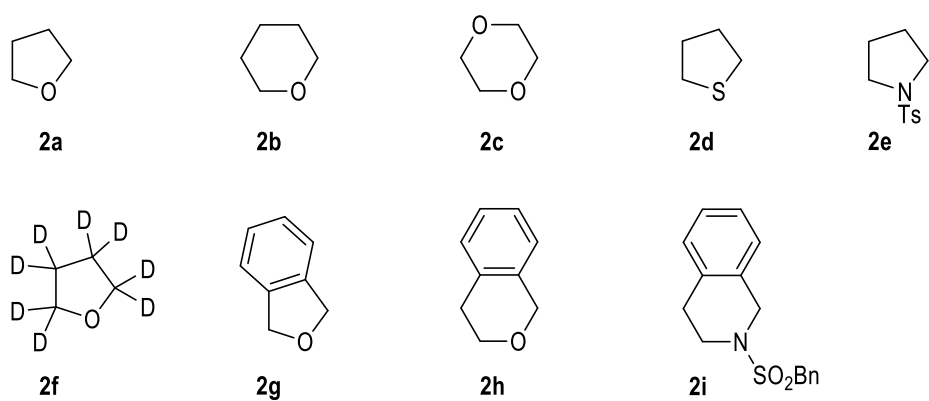

## Conditions optimization

The reaction condition optimization for *N*<sup>2</sup>-heteroalkylations 1,2,3-triazoles<sup>a,b</sup>

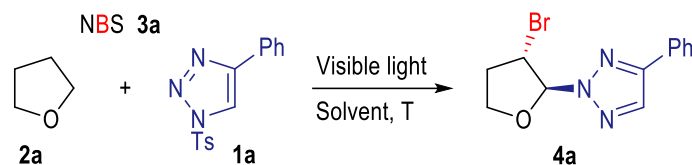

| entry     | R' | NBS <b>3a</b>     | solvent           | conditions                | yield <b>4a</b> (%) |
|-----------|----|-------------------|-------------------|---------------------------|---------------------|
| 1         | Ts | 1.5 equiv.        | THF               | 90 °C, 3.0 h, Ar          | 9                   |
| 2         | Ts | 1.5 equiv.        | THF               | 90 °C, 12.0 h, Ar         | 20                  |
| 3         | Ts | 1.5 equiv.        | PhCl              | 90 °C, 12.0 h, Ar         | 42                  |
| 4         | Ts | 1.5 equiv.        | PhCl              | 90 °C, 12.0 h, air        | 56                  |
| 5         | Ts | 1.5 equiv.        | PhCl              | 80 °C, 12.0 h, air        | 34                  |
| 6         | Ts | 1.5 equiv.        | PhCl              | 100 °C, 3.0 h, air        | 55                  |
| 7         | Ts | 1.5 equiv.        | PhCF <sub>3</sub> | 90 °C, 12.0 h, air        | 58                  |
| 8         | Ts | 1.5 equiv.        | PhBr              | 90 °C, 12.0 h, air        | 61                  |
| 9         | Ts | 1.5 equiv.        | PhF               | 90 °C, 12.0 h, air        | 68                  |
| 10        | Ts | 2.0 equiv.        | PhF               | 90 °C, 12.0 h, air        | 76                  |
| <b>11</b> | Ts | <b>3.0 equiv.</b> | <b>PhF</b>        | <b>90 °C, 12.0 h, air</b> | <b>85</b>           |
| 12        | Ms | 3.0 equiv.        | PhF               | 90 °C, 12.0 h, air        | 79                  |

<sup>a</sup>Unless noted, all reactions were carried out on a 0.20 mmol scale (**1a/2a** = 1.0/1.2) in 2.0 mL solvent. <sup>b</sup>Isolated yields.

The reaction condition optimization for *N*<sup>1</sup>-heteroalkylations 1,2,3-triazoles<sup>a,b</sup>

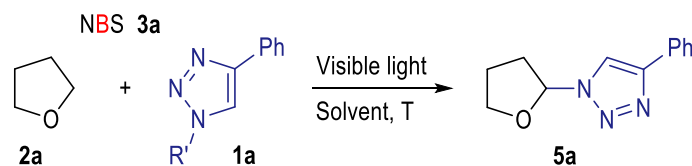

| entry     | R'        | NBS <b>3a</b>     | solvent       | conditions             | yield <b>5a</b> (%) |
|-----------|-----------|-------------------|---------------|------------------------|---------------------|
| 1         | Ts        | 0.2 equiv.        | DCM           | r.t., 3.0 h, Ar        | 13                  |
| 2         | Ts        | 0.2 equiv.        | DCM           | r.t., 3.0 h, air       | 8                   |
| 3         | Ts        | 0.4 equiv.        | DCM           | r.t., 3.0 h, Ar        | 20                  |
| 4         | Ts        | 0.6 equiv.        | DCM           | r.t., 3.0 h, Ar        | 31                  |
| 5         | Ts        | 1.2 equiv.        | DCM           | r.t., 3.0 h, Ar        | 40                  |
| 6         | Ts        | 1.5 equiv.        | DCM           | r.t., 3.0 h, Ar        | 52                  |
| 7         | Ts        | 1.5 equiv.        | Chloroform    | r.t., 3.0 h, Ar        | trace               |
| 8         | Ts        | 1.5 equiv.        | 1,2-DCE       | r.t., 3.0 h, Ar        | trace               |
| 9         | Ts        | 1.5 equiv.        | Mesitylene    | r.t., 3.0 h, Ar        | trace               |
| 10        | Ts        | 1.5 equiv.        | THF           | r.t., 3.0 h, Ar        | 70                  |
| 11        | Ts        | 1.5 equiv.        | Acetone       | r.t., 3.0 h, Ar        | 20                  |
| 12        | Ts        | 1.5 equiv.        | MeCN          | r.t., 3.0 h, Ar        | trace               |
| 13        | Ts        | 1.5 equiv.        | MeOH          | r.t., 3.0 h, Ar        | trace               |
| 14        | Ts        | 1.5 equiv.        | DMSO          | r.t., 3.0 h, Ar        | trace               |
| 15        | Ts        | 1.5 equiv.        | Cyclohexane   | r.t., 3.0 h, Ar        | 89                  |
| <b>16</b> | <b>Ts</b> | <b>1.5 equiv.</b> | <b>Hexane</b> | <b>r.t., 3.0 h, Ar</b> | <b>94</b>           |
| 17        | Ms        | 1.5 equiv.        | Hexane        | r.t., 3.0 h, Ar        | 90                  |

<sup>a</sup>Unless noted, all reactions were carried out on a 0.20 mmol scale (**1a/2a** = 1.0/1.2) in 2.0 mL solvent. <sup>b</sup>Isolated yields.

### Crude $^1\text{H}$ NMR Spectra of Compounds **4a** and **5a** in $\text{CDCl}_3$

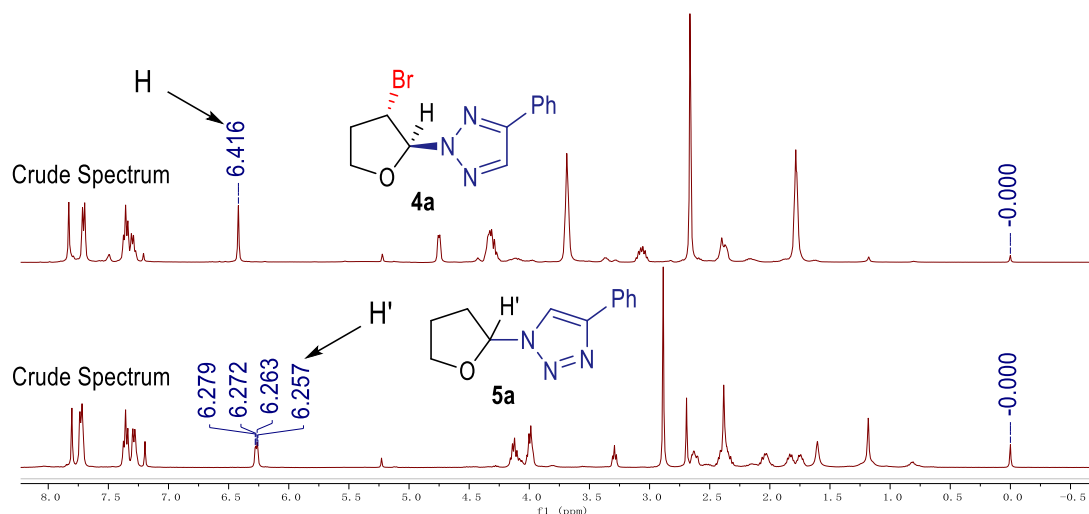

The corresponding reactions were performed under optimal conditions, products of direct  $N^2$ -alkylation (**4a'**),  $N^3$ -alkylation, and  $\alpha$ - $N^1$ -1,2,3-triazole- $\beta$ -bromination (**5a'**) were not observed.

### X-ray structure

The single crystal was obtained by slow evaporation of a saturated solution in ethyl acetate in a loosely capped vial. Structure information was deposited at the Cambridge Crystallographic Data Center (CCDC).

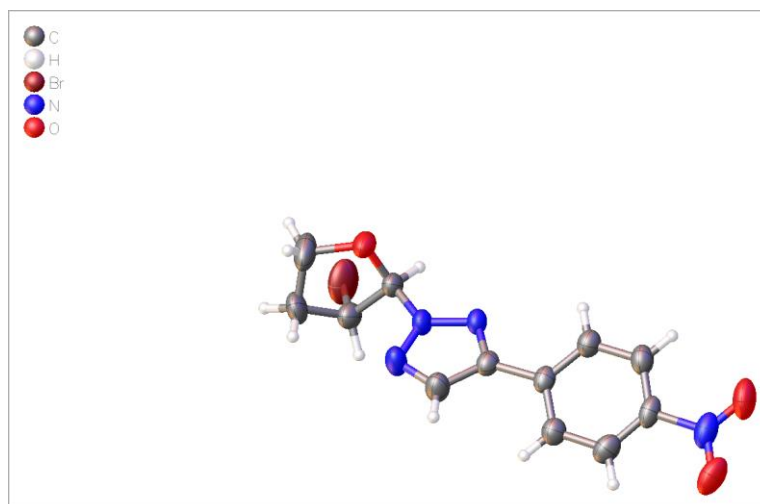

Fig. X-ray crystallographic structure of **4c** (CCDC 1974384).

## General Procedure A: Syntheses of products 4

A common ring-shaped white light LED lamp (5W) was used as the light source emitter of visible light in our reaction. For further confirmation of wavelength, we measured the wavelength of this LED lamp by a spectrometer (HORIBA Jobin Yvon S.A.S) coupled with a CCD (Charge-Coupled Device). As below figure shown, the result indicate that the wavelength of the current white light LED lamp is between 400 nm and 780 nm.

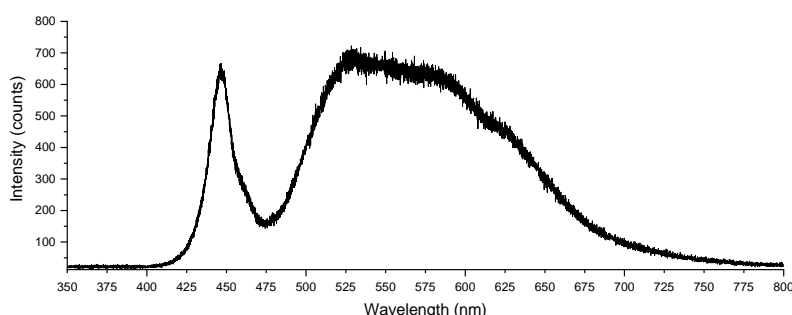

### Details of experiment procedure:

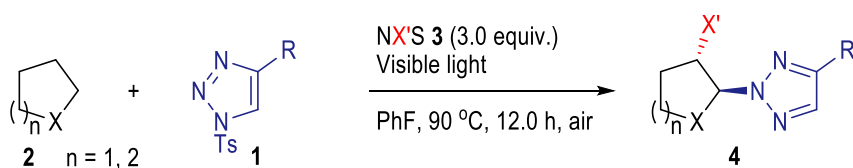

$N^1$ -tosyl-1,2,3-triazoles **1** (0.20 mmol), saturated heterocycles **2** (0.24 mmol),  $N$ -halogenated succinimide NX'S **3** (0.60 mmol) and PhF (2.0 mL) were added to an oven-dried 10.0 mL reaction tube. The reaction tube is placed in the center directly below the white light LED lamp which is placed 10 cm above reactor (as right photo shown). The reaction mixture was stirred at 90 °C for 12.0 hours. After triazole was completely consumed by TLC analysis, the reaction mixture was cooled to room temperature, and directly purified by flash chromatography (PE/EA = 50:1) to afford the products **4**.

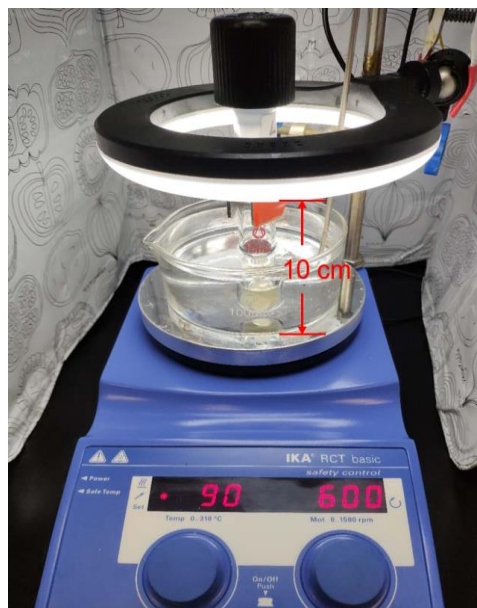

## General Procedure B: Syntheses of products 5

The condition of photocatalytic was the same as General Procedure A. The wavelength of the current white light LED lamp is between 400 nm and 780 nm.

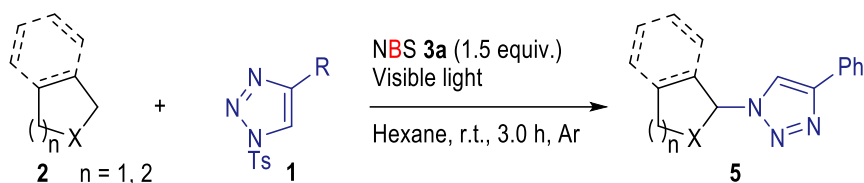

$N^1$ -tosyl-1,2,3-triazoles **1** (0.20 mmol), saturated heterocycles **2** (0.24 mmol), NBS **3a** (53.4 mg, 0.30 mmol) and hexane (2.0 mL) were added to an oven-dried 10.0 mL flask under argon atmosphere. The flask is placed in the center directly below the white light LED lamp which is placed 10 cm above reactor. The reaction mixture was stirred at room temperature for 3.0 hours. After triazole was completely consumed by TLC analysis, the reaction mixture was directly purified by flash chromatography (PE/EA = 30:1) to afford the products **5**.

## Synthetic transformations and applications

### Transformation of product **4a** via Keck reaction<sup>13</sup>

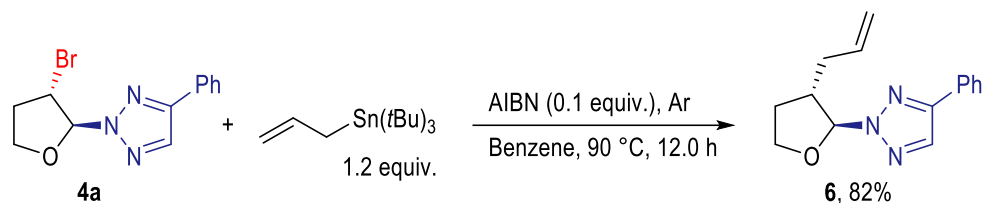

Product **4a** (58.6 mg, 0.20 mmol), allyltributyltin (79.5 mg, 0.24 mmol), AIBN (3.3 mg, 0.02 mmol) and benzene (2.0 mL) were added to an oven-dried 10.0 mL sealed tube under argon atmosphere. The reaction was stirred at 90 °C for 12.0 hours. After triazole was completely consumed by TLC analysis, the reaction was cooled to room temperature, then the reaction mixture was directly purified by flash chromatography (PE/EA = 80:1) to afford **6** (41.8 mg) in 82% yield.



## Synthesis of bioactive compound RAD51 inhibitor

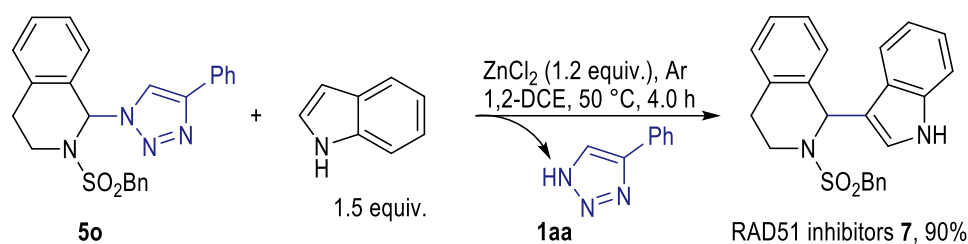

Product **5o** (86.0 mg, 0.20 mmol), indole (35.1 mg, 0.30 mmol), Zinc chloride (32.7 mg, 0.24 mmol) and 1,2-DCE (2.0 mL) were added to an oven-dried 10.0 mL sealed tube under argon atmosphere. The reaction was stirred at 50 °C for 4.0 hours. After triazole was completely consumed by TLC analysis, the reaction was cooled to room temperature, then the reaction mixture was directly purified by flash chromatography (PE/EA = 5:1 ) to afford the RAD51 inhibitor **7** (72.4 mg) in 90% yield.

## Up-scale reaction for product 4a

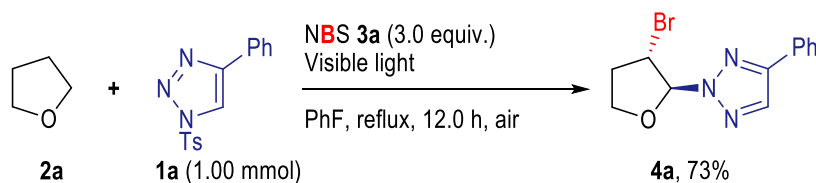

*N*<sup>1</sup>-tosyl-4-phenyl-1,2,3-triazole **1a** (1.00 mmol), THF **2a** (1.20 mmol), NBS **3a** (0.60 mmol) and PhF (10.0 mL) were added to an oven-dried 50.0 mL sealed flask. The reaction was placed under white LED light source, stirred and refluxed for 12.0 hours. After triazole was completely consumed by TLC analysis, the reaction was cooled to room temperature, the reaction mixture was directly purified by flash chromatography (PE/EA = 50:1) to afford the products **4a** (213.9 mg) in 73% yield.

## Characterization data for compounds

### *trans*-2-(3-bromotetrahydrofuran-2-yl)-4-phenyl-1,2,3-triazole (**4a**)

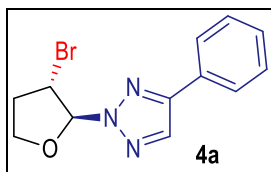

Compound **4a** was obtained from triazole **1a**, THF **2a** and NBS **3a** *via* the General Procedure A as a colorless oil (49.8 mg) in 85% yield. **<sup>1</sup>H NMR (500 MHz, CDCl<sub>3</sub>)**  $\delta$  7.80 (s, 1H), 7.69 (d,  $J = 7.0$  Hz, 2H), 7.34 (t,  $J = 7.5$  Hz, 2H), 7.28 (t,  $J = 7.5$  Hz, 1H), 6.41 (s, 1H), 4.74 – 4.73 (m, 1H), 4.35 – 4.27 (m, 2H), 3.09 – 3.02 (m, 1H), 2.38 – 2.35 (m, 1H); **<sup>13</sup>C NMR (125 MHz, CDCl<sub>3</sub>)**  $\delta$  148.6, 131.9, 129.8, 128.9, 128.7, 126.0, 98.2, 69.3, 48.6, 35.3; **IR (cm<sup>-1</sup>)**:  $\nu$  3441, 2978, 1609, 1477, 1296, 1086, 1055, 979, 769, 693; **HRMS**:  $m/z$  (ESI) calcd for C<sub>12</sub>H<sub>13</sub>BrN<sub>3</sub>O (M+H)<sup>+</sup> 294.0237, found 294.0239.

### *trans*-2-(3-bromotetrahydrofuran-2-yl)-4-(4-chlorophenyl)-1,2,3-triazole (**4b**)

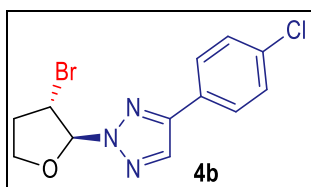

Compound **4b** was obtained from triazole **1b**, THF **2a** and NBS **3a** *via* the General Procedure A as a colorless oil (45.8 mg) in 70% yield. **<sup>1</sup>H NMR (500 MHz, CDCl<sub>3</sub>)**  $\delta$  7.79 (s, 1H), 7.63 (d,  $J = 7.0$  Hz, 2H), 7.32 (d,  $J = 7.0$  Hz, 2H), 6.40 (s, 1H), 4.74 – 4.73 (m, 1H), 4.35 – 4.28 (m, 2H), 3.08 – 3.01 (m, 1H), 2.41 – 2.36 (m, 1H); **<sup>13</sup>C NMR (125 MHz, CDCl<sub>3</sub>)**  $\delta$  147.6, 134.6, 131.9, 129.1, 128.3, 127.3, 98.3, 69.3, 48.4, 35.3; **IR (cm<sup>-1</sup>)**:  $\nu$  3448, 2926, 1479, 1378, 1306, 1085, 1051, 980, 833, 818; **HRMS**:  $m/z$  (ESI) calcd for C<sub>12</sub>H<sub>19</sub>BrClN<sub>3</sub>O (M+H)<sup>+</sup> 326.9847, found 326.9843.

*trans*-2-(3-bromotetrahydrofuran-2-yl)-4-(4-nitrophenyl)-1,2,3-triazole (**4c**)

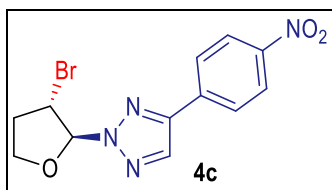

Compound **4c** was obtained from triazole **1c**, THF **2a** and NBS **3a** *via* the General Procedure A as a colorless solid (54.1 mg) in 80% yield. **m.p.**: 82 °C. **<sup>1</sup>H NMR (500 MHz, CDCl<sub>3</sub>)** δ 8.20 (d, *J* = 8.0 Hz, 2H), 7.93 (s, 1H), 7.88 (d, *J* = 7.5 Hz, 2H), 6.43 (s, 1H), 4.75 – 4.74 (m, 1H), 4.36 – 4.30 (m, 2H), 3.08 – 3.01 (m, 1H), 2.43 – 2.37 (m, 1H); **<sup>13</sup>C NMR (125 MHz, CDCl<sub>3</sub>)** δ 147.7, 146.3, 136.0, 132.7, 126.6, 124.2, 98.5, 69.5, 48.2, 35.2; **IR (cm<sup>-1</sup>)**: ν 3448, 2902, 1603, 1518, 1342, 1297, 1085, 1055, 981, 855; **HRMS**: *m/z* (ESI) calcd for C<sub>12</sub>H<sub>12</sub>BrN<sub>4</sub>O<sub>3</sub> (M+H)<sup>+</sup> 339.0087, found 339.0089.

*trans*-2-(3-bromotetrahydrofuran-2-yl)-4-(*p*-tolyl)-1,2,3-triazole (**4d**)

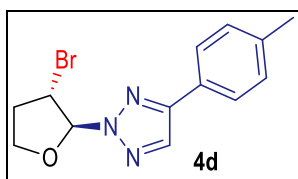

Compound **4d** was obtained from triazole **1d**, THF **2a** and NBS **3a** *via* the General Procedure A as a colorless oil (36.8 mg) in 60% yield. **<sup>1</sup>H NMR (500 MHz, CDCl<sub>3</sub>)** δ 7.78 (s, 1H), 7.59 (d, *J* = 8.0 Hz, 2H), 7.16 (d, *J* = 7.5 Hz, 2H), 6.40 (s, 1H), 4.75 – 4.74 (m, 1H), 4.35 – 4.27 (m, 2H), 3.10 – 3.02 (m, 1H), 2.40 – 2.34 (m, 1H), 2.30 (s, 3H); **<sup>13</sup>C NMR (125 MHz, CDCl<sub>3</sub>)** δ 148.7, 138.7, 131.8, 129.5, 127.0, 125.9, 98.2, 69.3, 48.6, 35.3, 21.3; **IR (cm<sup>-1</sup>)**: ν 3438, 2924, 2360, 1735, 1620, 1296, 1083, 1055, 981, 821; **HRMS**: *m/z* (ESI) calcd for C<sub>13</sub>H<sub>15</sub>BrN<sub>3</sub>O (M+H)<sup>+</sup> 308.0393, found 308.0399.

*trans*-2-(3-bromotetrahydrofuran-2-yl)-4-(4-methoxyphenyl)-1,2,3-triazole (**4e**)

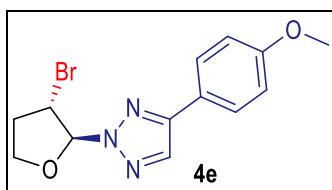

Compound **4e** was obtained from triazole **1e**, THF **2a** and NBS **3a** *via* the General Procedure A as a colorless oil (40.1 mg) in 62% yield. **<sup>1</sup>H NMR (500 MHz, CDCl<sub>3</sub>)**  $\delta$  7.74 (s, 1H), 7.63 (d,  $J$  = 8.5 Hz, 2H), 6.88 (d,  $J$  = 8.5 Hz, 2H), 6.40 (s, 1H), 4.75 – 4.74 (m, 1H), 4.35 – 4.27 (m, 2H), 3.77 (s, 3H), 3.10 – 3.03 (m, 1H), 2.40 – 2.36 (m, 1H); **<sup>13</sup>C NMR (125 MHz, CDCl<sub>3</sub>)**  $\delta$  160.1, 148.5, 131.5, 127.4, 122.5, 114.3, 98.1, 69.2, 55.3, 48.6, 35.4; **IR (cm<sup>-1</sup>)**:  $\nu$  3448, 2959, 1614, 1469, 1252, 1176, 1092, 1035, 992, 836; **HRMS**:  $m/z$  (ESI) calcd for C<sub>13</sub>H<sub>15</sub>BrN<sub>3</sub>O (M+H)<sup>+</sup> 324.0342, found 324.0349.

*trans*-2-(3-bromotetrahydrofuran-2-yl)-4-(naphthalen-2-yl)-1,2,3-triazole (**4f**)

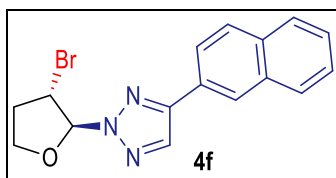

Compound **4f** was obtained from triazole **1f**, THF **2a** and NBS **3a** *via* the General Procedure A as a colorless oil (48.7 mg) in 71% yield. **<sup>1</sup>H NMR (500 MHz, CDCl<sub>3</sub>)**  $\delta$  8.12 (s, 1H), 7.89 (s, 1H), 7.80 – 7.76 (m, 3H), 7.73 (d,  $J$  = 6.5 Hz, 1H), 7.41 – 7.36 (m, 2H), 6.43 (s, 1H), 4.75 – 4.74 (m, 1H), 4.35 – 4.26 (m, 2H), 3.08 – 3.01 (m, 1H), 2.37 – 2.33 (m, 1H); **<sup>13</sup>C NMR (125 MHz, CDCl<sub>3</sub>)**  $\delta$  148.6, 133.4, 133.3, 132.1, 128.6, 128.1, 127.7, 127.1, 126.5, 126.4, 125.0, 123.8, 98.2, 69.3, 48.6, 35.3; **IR (cm<sup>-1</sup>)**:  $\nu$  3454, 3051, 2970, 2905, 1434, 1298, 1086, 1052, 828, 752; **HRMS**:  $m/z$  (ESI) calcd for C<sub>16</sub>H<sub>15</sub>BrN<sub>3</sub>O (M+H)<sup>+</sup> 344.0393, found 344.0398.

*trans*-2-(3-bromotetrahydrofuran-2-yl)-4-(2-bromothiophen-3-yl)-1,2,3-triazole (**4g**)

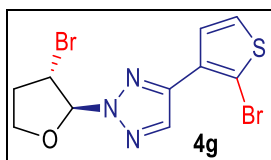

Compound **4g** was obtained from triazole **1g**, THF **2a** and NBS **3a** *via* the General Procedure A as a colorless oil (56.5 mg) in 75% yield. **<sup>1</sup>H NMR (500 MHz, CDCl<sub>3</sub>)**  $\delta$  8.15 (s, 1H), 7.28 (d,  $J$  = 5.0 Hz, 1H), 7.24 (d,  $J$  = 5.0 Hz, 1H), 6.42 (s, 1H), 4.73 (s, 1H), 4.35 – 4.31 (m, 2H), 3.10 – 3.03 (m, 1H), 2.41 – 2.36 (m, 1H); **<sup>13</sup>C NMR (125**

**MHz, CDCl<sub>3</sub>**)  $\delta$  143.2, 133.0, 130.6, 127.9, 126.7, 110.2, 98.2, 69.4, 48.5, 35.3; **IR** (**cm<sup>-1</sup>**):  $\nu$  3445, 2916, 1476, 1298, 1088, 1055, 979, 765; **HRMS**:  $m/z$  (ESI) calcd for C<sub>10</sub>H<sub>10</sub>Br<sub>2</sub>N<sub>3</sub>OS (M+H)<sup>+</sup> 377.8906, found 377.8902.

*trans*-1-(2-(3-bromotetrahydrofuran-2-yl)-1,2,3-triazol-4-yl)ethan-1-one and *trans*-2-bromo-1-(2-(3-bromotetrahydrofuran-2-yl)-1,2,3-triazol-4-yl)ethan-1-one (**4h** and **4h'**)

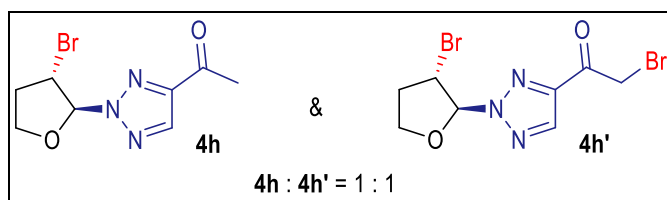

The 1:1 mixture of **4h** and **4h'** was obtained from triazole **1h**, THF **2a** and NBS **3a** via the General Procedure A as a colorless oil (35.8 mg) in 60% yield. **<sup>1</sup>H NMR (500 MHz, CDCl<sub>3</sub>)**  $\delta$  8.09 (s, 1H), 8.00 (s, 1H), 6.43 (s, 1H), 6.42 (s, 1H), 4.70 (s, 2H), 4.44 (s, 2H), 4.36 – 4.32 (m, 4H), 3.03 – 2.98 (m, 2H), 2.54 (s, 3H), 2.44 – 2.38 (m, 2H); **<sup>13</sup>C NMR (125 MHz, CDCl<sub>3</sub>)**  $\delta$  184.8 (191.9), 144.8 (147.6), 135.5 (136.4), 98.8 (99.0), 69.7 (69.8), 48.0 (48.1), 35.0 (35.1), 27.3 (31.3); **IR (cm<sup>-1</sup>)**:  $\nu$  3448, 3133, 2982, 2903, 1697, 1296, 1094, 1056, 991, 805; **HRMS**:  $m/z$  (ESI) calcd for C<sub>8</sub>H<sub>11</sub>BrN<sub>3</sub>O<sub>2</sub> (M+H)<sup>+</sup> 260.0029, found 260.0036; C<sub>8</sub>H<sub>10</sub>Br<sub>2</sub>N<sub>3</sub>O<sub>2</sub> (M+H)<sup>+</sup> 337.9134, found 337.9140.

*trans*-2-(3-bromotetrahydrofuran-2-yl)-benzo[*d*][1,2,3]triazole (**4i**)

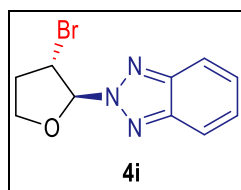

Compound **4i** was obtained from triazole **1i**, THF **2a** and NBS **3a** via the General Procedure A as a colorless oil (22.4 mg) in 42% yield. **<sup>1</sup>H NMR (500 MHz, CDCl<sub>3</sub>)**  $\delta$  7.80 (dd,  $J$  = 7.0, 3.0 Hz, 2H), 7.34 (dd,  $J$  = 6.5, 3.0 Hz, 2H), 6.68 (s, 1H), 4.80 (d,  $J$  = 5.0 Hz, 1H), 4.49 – 4.45 (m, 1H), 4.43 – 4.38 (m, 1H), 3.14 – 3.07 (m, 1H), 2.45 – 2.40 (m, 1H); **<sup>13</sup>C NMR (125 MHz, CDCl<sub>3</sub>)**  $\delta$  144.4, 127.1, 118.5, 99.8, 70.0, 48.9,

35.1; **IR** ( $\text{cm}^{-1}$ ):  $\nu$  3426, 2928, 1624, 1385, 1265, 1119, 856, 747; **HRMS**:  $m/z$  (ESI) calcd for  $\text{C}_{10}\text{H}_{11}\text{BrN}_3\text{O}$  ( $\text{M}+\text{H}$ ) $^+$  268.0080, found 268.0089.

*trans*-2-(3-bromotetrahydro-pyran-2-yl)-4-phenyl-1,2,3-triazole (**4j**)

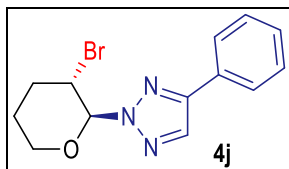

Compound **4j** was obtained from triazole **1a**, tetrahydropyran **2b** and NBS **3a** *via* the General Procedure A as a colorless oil (35.6 mg) in 58% yield.  **$^1\text{H}$  NMR (500 MHz,  $\text{CDCl}_3$ )**  $\delta$  7.88 (s, 1H), 7.75 (d,  $J = 7.5$  Hz, 2H), 7.35 (t,  $J = 7.0$  Hz, 2H), 7.28 (t,  $J = 7.0$  Hz, 1H), 5.66 – 5.63 (m, 1H), 4.72 – 4.67 (m, 1H), 4.13 – 4.09 (m, 1H), 3.75 – 3.69 (m, 1H), 2.63 – 2.59 (m, 1H), 2.14 – 2.06 (m, 1H), 1.94 – 1.86 (m, 1H), 1.72 – 1.68 (m, 1H);  **$^{13}\text{C}$  NMR (125 MHz,  $\text{CDCl}_3$ )**  $\delta$  148.7, 132.1, 129.8, 128.8, 128.8, 126.2, 92.7, 68.1, 46.9, 34.5, 26.7; **IR** ( $\text{cm}^{-1}$ ):  $\nu$  3456, 2953, 1455, 1396, 1300, 1069, 1039, 944, 779, 731; **HRMS**:  $m/z$  (ESI) calcd for  $\text{C}_{13}\text{H}_{15}\text{BrN}_3\text{O}$  ( $\text{M}+\text{H}$ ) $^+$  308.0393, found 308.0401.

*trans*-2-(3-bromo-1,4-dioxan-2-yl)-4-phenyl-1,2,3-triazole (**4k**)

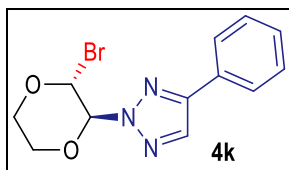

Compound **4k** was obtained from triazole **1a**, 1,4-dioxane **2c** and NBS **3a** *via* the General Procedure A as a colorless oil (30.9 mg) in 50% yield.  **$^1\text{H}$  NMR (500 MHz,  $\text{CDCl}_3$ )**  $\delta$  7.92 (s, 1H), 7.75 (d,  $J = 7.0$  Hz, 2H), 7.38 (dd,  $J = 7.5, 7.0$  Hz, 2H), 7.31 (t,  $J = 7.5$  Hz, 1H), 6.85 (s, 1H), 6.05 (s, 1H), 4.38 (td,  $J = 12.0, 3.0$  Hz, 1H), 4.18 (dd,  $J = 12.0, 2.5$  Hz, 1H), 3.80 (d,  $J = 11.0$  Hz, 2H);  **$^{13}\text{C}$  NMR (125 MHz,  $\text{CDCl}_3$ )**  $\delta$  148.8, 132.3, 129.6, 129.0, 128.9, 126.2, 87.4, 82.8, 61.5, 61.0; **IR** ( $\text{cm}^{-1}$ ):  $\nu$  3435, 2925, 1627, 1457, 1385, 1124, 1102, 977, 942, 769; **HRMS**:  $m/z$  (ESI) calcd for  $\text{C}_{12}\text{H}_{13}\text{BrN}_3\text{O}_2$  ( $\text{M}+\text{H}$ ) $^+$  310.0186, found 310.0194.

*trans*-2-(3-bromotetrahydrothiophen-2-yl)-4-phenyl-1,2,3-triazole (**4l**)

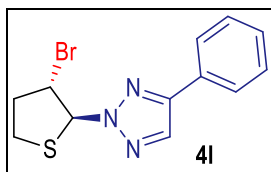

Compound **4l** was obtained from triazole **1a**, tetrahydrothiophene **2d** and NBS **3a** via the General Procedure A as a colorless oil (32.8 mg) in 53% yield. **<sup>1</sup>H NMR (500 MHz, CDCl<sub>3</sub>)** δ 7.81 (s, 1H), 7.70 (d, *J* = 7.0 Hz, 2H), 7.36 (t, *J* = 7.5 Hz, 2H), 7.29 (t, *J* = 7.5 Hz, 1H), 6.33 (d, *J* = 2.5 Hz, 1H), 4.92 (dd, *J* = 7.5, 4.5 Hz, 1H), 3.31 – 3.23 (m, 2H), 3.03 – 2.96 (m, 1H), 2.53 – 2.48 (m, 1H); **<sup>13</sup>C NMR (125 MHz, CDCl<sub>3</sub>)** δ 148.6, 132.0, 129.8, 128.9, 128.8, 126.0, 78.0, 53.4, 38.9, 31.2; **IR (cm<sup>-1</sup>):** ν 3449, 1536, 1475, 1293, 1205, 1092, 992, 978, 808, 769; **HRMS:** *m/z* (ESI) calcd for C<sub>12</sub>H<sub>13</sub>BrN<sub>3</sub>S (M+H)<sup>+</sup> 310.0008, found 310.0013.

2-(3,3-dibromo-1-tosylpyrrolidin-2-yl)-4-phenyl-1,2,3-triazole (**4m**)

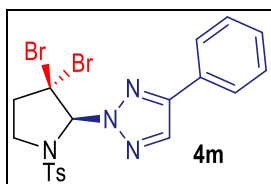

Compound **4m** was obtained from triazole **1a**, *N*-tosylpyrrolidine **2e** and NBS **3a** via the General Procedure A as a colorless oil (62.9 mg) in 60% yield. **<sup>1</sup>H NMR (500 MHz, CDCl<sub>3</sub>)** δ 7.73 (d, *J* = 7.0 Hz, 2H), 7.45 (d, *J* = 8.0 Hz, 2H), 7.37 (d, *J* = 7.0 Hz, 4H), 7.08 (d, *J* = 8.0 Hz, 2H), 6.50 (s, 1H), 3.77 – 3.74 (m, 2H), 3.45 – 3.38 (m, 1H), 2.90 – 2.86 (m, 1H), 2.20(s, 3H); **<sup>13</sup>C NMR (125 MHz, CDCl<sub>3</sub>)** δ 146.2, 144.4, 134.3, 130.0, 129.6, 129.2, 128.5, 128.3, 127.4, 127.1, 86.0, 58.6, 46.8, 44.9, 21.4; **IR (cm<sup>-1</sup>):** ν 3448, 2924, 1597, 1454, 1360, 1167, 1127, 1040, 1007, 770; **HRMS:** *m/z* (ESI) calcd for C<sub>19</sub>H<sub>19</sub>Br<sub>2</sub>N<sub>4</sub>O<sub>2</sub>S (M+H)<sup>+</sup> 524.9590, found 524.9585.

*trans*-2-(3-chlorotetrahydrofuran-2-yl)-4-phenyl-1,2,3-triazole (**4n**)

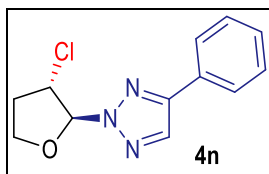

Compound **4n** was obtained from triazole **1a**, THF **2a** and NCS **3b** *via* the General Procedure A as a colorless oil (30.4 mg) in 61% yield. **<sup>1</sup>H NMR (500 MHz, CDCl<sub>3</sub>)** δ 7.82 (s, 1H), 7.71 (d, *J* = 8.0 Hz, 2H), 7.36 (t, *J* = 7.5 Hz, 2H), 7.30 (t, *J* = 7.5 Hz, 1H), 6.30 (s, 1H), 4.80 – 4.79 (m, 1H), 4.37 – 4.28 (m, 2H), 3.03 – 2.96 (m, 1H), 2.33 – 2.29 (m, 1H); **<sup>13</sup>C NMR (125 MHz, CDCl<sub>3</sub>)** δ 148.7, 132.0, 129.8, 128.9, 128.8, 126.1, 97.8, 69.2, 60.1, 34.8; **IR (cm<sup>-1</sup>)**: ν 3448, 2924, 1630, 1477, 1384, 1297, 1088, 1062, 980, 770; **HRMS**: *m/z* (ESI) calcd for C<sub>12</sub>H<sub>13</sub>ClN<sub>3</sub>O (M+H)<sup>+</sup> 250.0742, found 250.0747.

*trans*-2-(3-iodotetrahydrofuran-2-yl)-4-phenyl-1,2,3-triazole (**4o**)

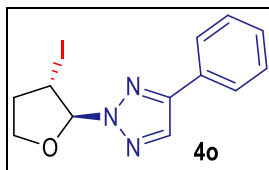

Compound **4o** was obtained from triazole **1a**, THF **2a** and NIS **3c** *via* the General Procedure A as a colorless oil (35.5 mg) in 52% yield. **<sup>1</sup>H NMR (500 MHz, CDCl<sub>3</sub>)** δ 7.82 (s, 1H), 7.71 (d, *J* = 7.0 Hz, 2H), 7.36 (t, *J* = 7.5 Hz, 2H), 7.30 (t, *J* = 7.5 Hz, 1H), 6.50 (s, 1H), 4.74 – 4.72 (m, 1H), 4.34 – 4.23 (m, 2H), 3.03 – 2.95 (m, 1H), 2.41 – 2.34 (m, 1H); **<sup>13</sup>C NMR (125 MHz, CDCl<sub>3</sub>)** δ 148.6, 131.9, 129.9, 128.9, 128.8, 126.1, 100.1, 69.5, 37.2, 21.1; **IR (cm<sup>-1</sup>)**: ν 3448, 2970, 1637, 1477, 1294, 1084, 1047, 979, 802, 769; **HRMS**: *m/z* (ESI) calcd for C<sub>12</sub>H<sub>13</sub>IN<sub>3</sub>O (M+H)<sup>+</sup> 342.0098, found 342.0108.

*trans*-2-(3-bromotetrahydrofuran-2-yl)-2,3,4,4,5,5-d<sub>6</sub>-4-phenyl-1,2,3-triazole (**4p**)

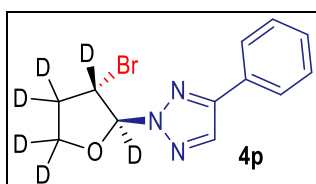



Compound **4p** was obtained from triazole **1a**, THF-d<sub>8</sub> **2f** and NBS **3a** *via* the General Procedure A as a colorless oil (44.7 mg) in 78% yield. **<sup>1</sup>H NMR (500 MHz, CDCl<sub>3</sub>)** δ 7.81 (s, 1H), 7.70 (d, *J* = 8.5 Hz, 2H), 7.35 (t, *J* = 7.5 Hz, 2H), 7.28 (t, *J* = 7.5 Hz, 1H); **<sup>13</sup>C NMR (125 MHz, CDCl<sub>3</sub>)** δ 148.7, 132.0, 129.9, 128.9, 128.9, 126.1, 98.3, 69.4, 48.6, 35.4; **IR (cm<sup>-1</sup>)**: ν 3128, 3076, 3036, 2239, 1459, 1298, 1078, 1043, 978, 771; **HRMS**: *m/z* (ESI) calcd for C<sub>12</sub>H<sub>7</sub>D<sub>6</sub>BrN<sub>3</sub>O (M+H)<sup>+</sup> 300.0613, found 300.0620.

4-phenyl-1-(tetrahydrofuran-2-yl)-1,2,3-triazole (**5a**)<sup>14</sup>

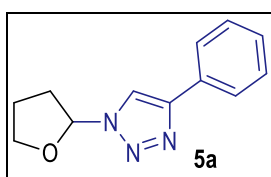

Compound **5a** was obtained from triazole **1a**, THF **2a** and NBS **3a** *via* the General Procedure B as a colorless oil (40.4 mg) in 94% yield. **<sup>1</sup>H NMR (500 MHz, CDCl<sub>3</sub>)** δ 7.79 (s, 1H), 7.72 (d, *J* = 7.5 Hz, 2H), 7.34 (t, *J* = 7.5 Hz, 2H), 7.27 (t, *J* = 7.5 Hz, 1H), 6.26 – 6.25 (m, 1H), 4.14 – 4.10 (m, 1H), 4.00 – 3.96 (m, 1H), 2.65 – 2.59 (m, 1H), 2.42 – 2.29 (m, 2H), 2.05 – 1.97 (m, 1H).

4-(4-chlorophenyl)-1-(tetrahydrofuran-2-yl)-1,2,3-triazole (**5b**)<sup>15</sup>

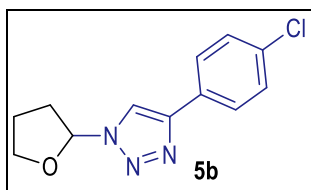

Compound **5b** was obtained from triazole **1b**, THF **2a** and NBS **3a** *via* the General Procedure B as a colorless oil (34.4 mg) in 69% yield. **<sup>1</sup>H NMR (500 MHz, CDCl<sub>3</sub>)** δ 7.77 (s, 1H), 7.65 (d, *J* = 8.5 Hz, 2H), 7.31 (d, *J* = 8.5 Hz, 2H), 6.25 (dd, *J* = 6.5, 2.0 Hz, 1H), 4.14 – 4.09 (m, 1H), 4.05 – 3.96 (m, 1H), 2.64 – 2.58 (m, 1H), 2.38 – 2.33 (m, 2H), 2.06 – 1.99 (m, 1H).

1-(tetrahydrofuran-2-yl)-4-(p-tolyl)-1,2,3-triazole (**5c**)<sup>15</sup>

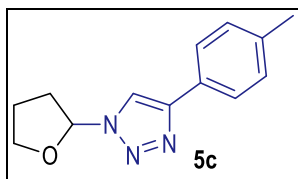

Compound **5c** was obtained from triazole **1d**, THF **2a** and NBS **3a** *via* the General Procedure B as a colorless oil (39.4 mg) in 86% yield. <sup>1</sup>H NMR (500 MHz, CDCl<sub>3</sub>) δ 7.75 (s, 1H), 7.60 (d, *J* = 8.0 Hz, 2H), 7.14 (d, *J* = 7.5 Hz, 2H), 6.24 (dd, *J* = 7.0, 2.5 Hz, 1H), 4.11 – 4.08 (m, 1H), 3.99 – 3.94 (m, 1H), 2.63 – 2.58 (m, 1H), 2.41 – 2.29 (m, 5H), 2.04 – 1.95 (m, 1H).

4-(4-methoxyphenyl)-1-(tetrahydrofuran-2-yl)-1,2,3-triazole (**5d**)<sup>16</sup>

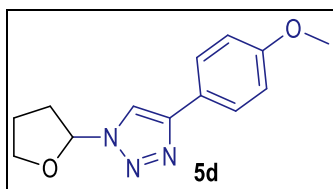

Compound **5d** was obtained from triazole **1e**, THF **2a** and NBS **3a** *via* the General Procedure B as a colorless oil (44.6 mg) in 91% yield. <sup>1</sup>H NMR (500 MHz, CDCl<sub>3</sub>) δ 7.72 (s, 1H), 7.64 (d, *J* = 9.0 Hz, 2H), 6.87 (d, *J* = 9.0 Hz, 2H), 6.24 (dd, *J* = 7.0, 2.5 Hz, 1H), 4.13 – 4.08 (m, 1H), 3.99 – 3.95 (m, 1H), 3.75 (s, 3H), 2.65 – 2.58 (m, 1H), 2.41 – 2.29 (m, 2H), 2.05 – 1.96 (m, 1H).

4-butyl-1-(tetrahydrofuran-2-yl)-1,2,3-triazole (**5e**)<sup>17</sup>

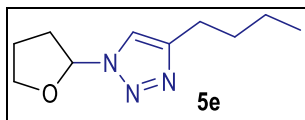

Compound **5e** was obtained from triazole **1j**, THF **2a** and NBS **3a** *via* the General Procedure B as a colorless oil (35.1 mg) in 90% yield. <sup>1</sup>H NMR (500 MHz, CDCl<sub>3</sub>) δ 7.32 (s, 1H), 6.17 (dd, *J* = 6.5, 2.5 Hz, 1H), 4.07 – 4.03 (m, 1H), 3.97 – 3.92 (m, 1H), 2.60 (t, *J* = 7.5 Hz, 2H), 2.57 – 2.54 (m, 1H), 2.33 – 2.28 (m, 2H), 2.03 – 1.96 (m, 1H), 1.60 – 1.54 (m, 2H), 1.35 – 1.27 (m, 2H), 0.86 (t, *J* = 7.5 Hz, 3H).

4-(*tert*-butyl)-1-(tetrahydrofuran-2-yl)-1,2,3-triazole (**5f**)

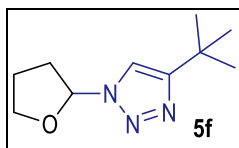

Compound **5f** was obtained from triazole **1k**, THF **2a** and NBS **3a** *via* the General Procedure B as a colorless oil (31.2 mg) in 80% yield. **<sup>1</sup>H NMR (500 MHz, CDCl<sub>3</sub>)** δ 7.35 (s, 1H), 6.17 – 6.16 (m, 1H), 4.05 (q, *J* = 7.0 Hz, 1H), 3.93 (q, *J* = 7.0 Hz, 1H), 2.59 – 2.54 (m, 1H), 2.35 – 2.25 (m, 2H), 2.03 – 1.95 (m, 1H), 1.25 (s, 9H); **<sup>13</sup>C NMR (125 MHz, CDCl<sub>3</sub>)** δ 157.8, 131.0, 91.8, 69.3, 31.1, 30.8, 30.3, 24.5; **IR (cm<sup>-1</sup>):** ν 2965, 2932, 2906, 2872, 1513, 1462, 1297, 1229, 1072, 1015, 813, 729; **HRMS:** *m/z* (ESI) calcd for C<sub>10</sub>H<sub>18</sub>N<sub>3</sub>O (M+H)<sup>+</sup> 196.1444, found 196.1450.

4-cyclohexyl-1-(tetrahydrofuran-2-yl)-1,2,3-triazole (**5g**)<sup>17</sup>

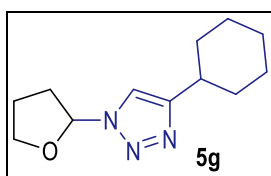

Compound **5g** was obtained from triazole **1l**, THF **2a** and NBS **3a** *via* the General Procedure B as a colorless oil (40.3 mg) in 91% yield. **<sup>1</sup>H NMR (500 MHz, CDCl<sub>3</sub>)** δ 7.32 (s, 1H), 6.17 – 6.16 (m, 1H), 4.07 – 4.02 (m, 1H), 3.96 – 3.91 (m, 1H), 2.66 – 2.62 (m, 1H), 2.57 – 2.53 (m, 1H), 2.36 – 2.25 (m, 2H), 2.02 – 1.92 (m, 3H), 1.73 (d, *J* = 12 Hz, 2H), 1.64 (d, *J* = 12.5 Hz, 1H), 1.39 – 1.27 (m, 4H), 1.22 – 1.17 (m, 1H).

methyl 1-(tetrahydrofuran-2-yl)-1,2,3-triazole-4-carboxylate (**5h**)

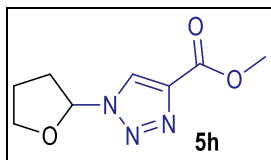

Compound **5h** was obtained from triazole **1m**, THF **2a** and NBS **3a** *via* the General Procedure B as a colorless oil (32.4 mg) in 83% yield. **<sup>1</sup>H NMR (500 MHz, CDCl<sub>3</sub>)** δ 8.00 (s, 1H), 6.29 (dd, *J* = 6.5, 2.5 Hz, 1H), 4.16 – 4.12 (m, 1H), 4.02 – 3.98 (m, 1H), 3.88 (s, 3H), 2.58 – 2.52 (m, 1H), 2.39 – 2.33 (m, 2H), 2.06 – 1.98 (m, 1H); **<sup>13</sup>C NMR**

(125 MHz, CDCl<sub>3</sub>)  $\delta$  161.0, 139.7, 137.1, 93.3, 69.9, 52.2, 31.7, 24.2; IR (cm<sup>-1</sup>):  $\nu$  3141, 2958, 2897, 1733, 1513, 1439, 1299, 1227, 955, 890; HRMS  $m/z$  (ESI) calcd for C<sub>8</sub>H<sub>11</sub>N<sub>3</sub>NaO<sub>3</sub> (M+Na)<sup>+</sup> 220.0693, found 220.0691.

1-(tetrahydrofuran-2-yl)-benzo[d][1,2,3]triazole (**5i**)<sup>18</sup>

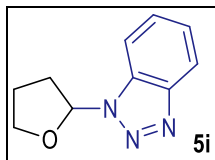

Compound **5i** was obtained from triazole **1i**, THF **2a** and NBS **3a** *via* the General Procedure B as a colorless oil (32.5 mg) in 86% yield. <sup>1</sup>H NMR (500 MHz, CDCl<sub>3</sub>)  $\delta$  8.00 (d,  $J$  = 8.0 Hz, 1H), 7.64 (d,  $J$  = 8.5 Hz, 1H), 7.43 (t,  $J$  = 7.5 Hz, 1H), 7.31 (t,  $J$  = 7.5 Hz, 1H), 6.44 (dd,  $J$  = 6.5, 2.5 Hz, 1H), 4.05 – 4.01 (m, 1H), 3.99 – 3.94 (m, 1H), 3.12 – 3.07 (m, 1H), 2.49 – 2.42 (m, 1H), 2.37 – 2.29 (m, 1H), 2.15 – 2.10 (m, 1H).

4-phenyl-1-(tetrahydro-2H-pyran-2-yl)-1,2,3-triazole (**5j**)<sup>17</sup>

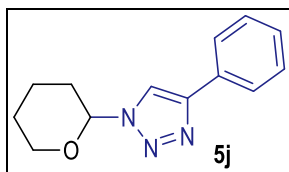

Compound **5j** was obtained from triazole **1a**, tetrahydropyran **2b** and NBS **3a** *via* the General Procedure B as a colorless oil (28.4 mg) in 62% yield. <sup>1</sup>H NMR (500 MHz, CDCl<sub>3</sub>)  $\delta$  7.92 (s, 1H), 7.83 – 7.81 (m, 2H), 7.42 (t,  $J$  = 7.5 Hz, 2H), 7.35 (t,  $J$  = 7.5 Hz, 1H), 5.75 (dd,  $J$  = 9.0, 3.0 Hz, 1H), 4.11 – 4.06 (m, 1H), 3.79 – 3.74 (m, 1H), 2.52 – 2.44 (m, 1H), 2.19 – 2.09 (m, 2H), 1.81 – 1.73 (m, 2H), 1.70 – 1.64 (m, 1H).

1-(1,3-dihydroisobenzofuran-1-yl)-4-phenyl-1,2,3-triazole (**5k**)

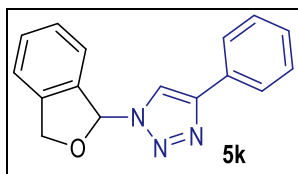

Compound **5k** was obtained from triazole **1a**, 1,3-dihydrobenzofuran **2g** and NBS **3a** *via* the General Procedure B as a colorless oil (41.6 mg) in 79% yield. <sup>1</sup>H NMR (500

**MHz, CDCl<sub>3</sub>**)  $\delta$  7.80 (s, 1H), 7.69 (d,  $J$  = 7.5 Hz, 2H), 7.39 – 7.36 (m, 2H), 7.32 (t,  $J$  = 7.0 Hz, 3H), 7.29 – 7.23 (m, 3H), 5.44 (d,  $J$  = 12.5 Hz, 1H), 5.16 (d,  $J$  = 12.5 Hz, 1H); **<sup>13</sup>C NMR (125 MHz, CDCl<sub>3</sub>)**  $\delta$  148.4, 139.9, 135.4, 132.3, 130.1, 129.7, 128.8, 128.6, 128.0, 126.1, 122.8, 121.3, 95.5, 74.0; **IR (cm<sup>-1</sup>)**:  $\nu$  3055, 2990, 2949, 2887, 1629, 1542, 1464, 1436, 1342, 1275, 1073, 900, 750, 697; **HRMS**  $m/z$  (ESI) calcd for C<sub>16</sub>H<sub>13</sub>N<sub>3</sub>NaO (M+Na)<sup>+</sup> 286.0951, found 286.0950.

1-(isochroman-1-yl)-4-phenyl-1,2,3-triazole (**5l**)<sup>19</sup>

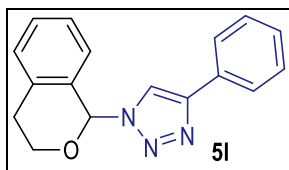

Compound **5l** was obtained from triazole **1a**, isochromane **2h** and NBS **3a** *via* the General Procedure B as a colorless oil (37.7 mg) in 68% yield. **<sup>1</sup>H NMR (500 MHz, CDCl<sub>3</sub>)**  $\delta$  7.82 (s, 1H), 7.72 (d,  $J$  = 7.5 Hz, 2H), 7.42 (t,  $J$  = 7.5 Hz, 2H), 7.27 – 7.22 (m, 2H), 7.18 (d,  $J$  = 7.5 Hz, 1H), 7.12 (t,  $J$  = 7.5 Hz, 1H), 6.98 (s, 1H), 6.94 (d,  $J$  = 8.0 Hz, 1H), 4.30 – 4.25 (m, 1H), 4.01 – 3.98 (m, 1H), 3.10 – 3.03 (m, 1H), 2.87 (d,  $J$  = 16.0 Hz, 1H).

4-phenyl-1-(tetrahydrothiophen-2-yl)-1,2,3-triazole (**5m**)

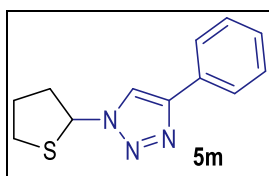

Compound **5m** was obtained from triazole **1a**, tetrahydrothiophene **2d** and NBS **3a** *via* the General Procedure B as a colorless oil (37.0 mg) in 80% yield. **<sup>1</sup>H NMR (500 MHz, CDCl<sub>3</sub>)**  $\delta$  7.78 (s, 1H), 7.72 – 7.70 (m, 2H), 7.35 (t,  $J$  = 7.5 Hz, 2H), 7.34 (t,  $J$  = 7.5 Hz, 1H), 6.24 (dd,  $J$  = 6.5, 2.5 Hz, 1H), 3.24 – 3.20 (m, 1H), 2.97 – 2.92 (m, 1H), 2.72 – 2.69 (m, 1H), 2.59 – 2.51 (m, 1H), 2.33 – 2.27 (m, 1H), 2.26 – 2.19 (m, 1H); **<sup>13</sup>C NMR (125 MHz, CDCl<sub>3</sub>)**  $\delta$  147.9, 131.3, 130.3, 128.8, 128.5, 126.0, 71.6, 37.5, 33.7, 29.6; **IR (cm<sup>-1</sup>)**:  $\nu$  3052, 2919, 2849, 1620, 1474, 1458, 1365, 1089, 978, 768,

692, 556; **HRMS**  $m/z$  (ESI) calcd for  $C_{12}H_{13}N_3NaS$  ( $M+Na$ )<sup>+</sup> 254.0722, found 254.0721.

4-phenyl-1-(1-tosylpyrrolidin-2-yl)-1,2,3-triazole (**5n**)

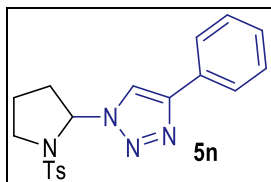

Compound **5n** was obtained from triazole **1a**, *N*-tosylpyrrolidine **2e** and NBS **3a** via the General Procedure B as a colorless oil (44.2 mg) in 60% yield. **<sup>1</sup>H NMR (500 MHz, CDCl<sub>3</sub>)**  $\delta$  7.59 (s, 1H), 7.52 (d,  $J$  = 7.0 Hz, 2H), 7.36 – 7.31 (m, 4H), 7.27 (t,  $J$  = 7.5 Hz, 1H), 6.98 (d,  $J$  = 8.0 Hz, 2H), 6.38 (d,  $J$  = 7.0 Hz, 1H), 3.70 – 3.62 (m, 2H), 2.52 – 2.43 (m, 1H), 2.37 – 2.29 (m, 1H), 2.22 – 2.14 (m, 1H), 2.07 (s, 3H), 2.12 – 2.02 (m, 1H); **<sup>13</sup>C NMR (125 MHz, CDCl<sub>3</sub>)**  $\delta$  147.7, 143.3, 135.5, 130.6, 129.9, 129.2, 128.7, 128.4, 126.8, 125.8, 77.0, 48.2, 35.6, 23.2, 21.2; **IR (cm<sup>-1</sup>)**:  $\nu$  3500, 2925, 1645, 1456, 1261, 1091, 768; **HRMS**  $m/z$  (ESI) calcd for  $C_{19}H_{20}N_4NaO_2S$  ( $M+Na$ )<sup>+</sup> 391.1199, found 391.1197.

2-(benzylsulfonyl)-1-(4-phenyl-1,2,3-triazol-1-yl)-1,2,3,4-tetrahydroisoquinoline (**5o**)

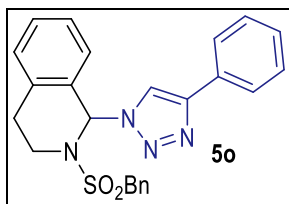

Compound **5o** was obtained from triazole **1a**, *N*-protected tetrahydroisoquinoline **2i** and NBS **3a** via the General Procedure B as a colorless oil (71.4 mg) in 83% yield. **<sup>1</sup>H NMR (500 MHz, CDCl<sub>3</sub>)**  $\delta$  7.97 (s, 1H), 7.84 (d,  $J$  = 8.0 Hz, 2H), 7.54 (s, 1H), 7.45 (t,  $J$  = 7.5 Hz, 2H), 7.38 (t,  $J$  = 7.5 Hz, 1H), 7.34 – 7.27 (m, 2H), 7.21 – 7.17 (m, 4H), 7.08 (d,  $J$  = 7.5 Hz, 1H), 6.95 (d,  $J$  = 7.5 Hz, 2H), 4.15 (d,  $J$  = 14.0 Hz, 1H), 4.06 (d,  $J$  = 14.0 Hz, 1H), 3.56 – 3.46 (m, 2H), 3.07 – 3.00 (m, 1H), 2.78 (d,  $J$  = 16.5 Hz, 1H); **<sup>13</sup>C NMR (125 MHz, CDCl<sub>3</sub>)**  $\delta$  148.5, 134.3, 130.6, 129.9, 129.7, 129.2, 129.0, 128.9, 128.7, 128.7, 128.7, 128.5, 128.1, 127.8, 126.8, 126.3, 126.1, 71.8, 59.5, 40.8, 29.2;

**IR** ( $\text{cm}^{-1}$ ):  $\nu$  2965, 2851, 1508, 1347, 1065, 926, 817; **HRMS**  $m/z$  (ESI) calcd for  $\text{C}_{24}\text{H}_{22}\text{N}_4\text{NaO}_2\text{S}$  ( $\text{M}+\text{Na}$ ) $^+$  453.1356, found 453.1363.

*trans*-2-(3-allyltetrahydrofuran-2-yl)-4-phenyl-1,2,3-triazole (**6**)

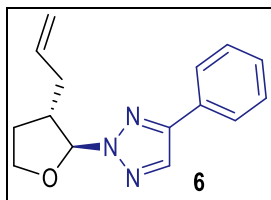

Compound **6** was obtained as a colorless oil (41.8 mg) in 82% yield.  **$^1\text{H}$  NMR** (500 MHz,  $\text{CDCl}_3$ )  $\delta$  7.81 (s, 1H), 7.73 (d,  $J = 7.0$  Hz, 2H), 7.35 (t,  $J = 7.5$  Hz, 2H), 7.27 (t,  $J = 7.5$  Hz, 1H), 5.93 (d,  $J = 7.0$  Hz, 1H), 5.75 – 5.67 (m, 1H), 5.05 (d,  $J = 17.0$  Hz, 1H), 5.00 (d,  $J = 10.0$  Hz, 1H), 4.15 (d,  $J = 7.5$  Hz, 1H), 4.09 – 4.05 (m, 1H), 3.08 – 3.01 (m, 1H), 2.50 – 2.44 (m, 1H), 2.35 – 2.29 (m, 1H), 2.25 – 2.19 (m, 1H), 1.81 – 1.76 (m, 1H);  **$^{13}\text{C}$  NMR** (125 MHz,  $\text{CDCl}_3$ )  $\delta$  148.2, 135.3, 131.5, 130.3, 128.8, 128.5, 126.0, 117.3, 96.6, 69.3, 44.0, 37.1, 30.7; **IR**( $\text{cm}^{-1}$ ):  $\nu$  3450, 3059, 1688, 1597, 1345, 1161, 1023, 756, 698, 517; **HRMS**:  $m/z$ : ( $\text{M}+\text{H}$ ) $^+$  calculated for  $\text{C}_{15}\text{H}_{18}\text{N}_3\text{O}^+$ , 256.1444, found 256.1452.

2-(benzylsulfonyl)-1-(1H-indol-3-yl)-1,2,3,4-tetrahydroisoquinoline (**7**)<sup>20</sup>

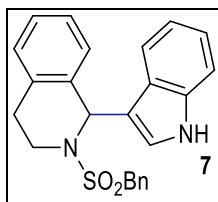

Compound **7** was obtained as a colorless oil (72.4 mg) in 90% yield.  **$^1\text{H}$  NMR** (500 MHz,  $\text{CDCl}_3$ )  $\delta$  8.12 (s, 1H), 7.70 (d,  $J = 7.5$  Hz, 1H), 7.34 (d,  $J = 8.0$  Hz, 1H), 7.17 – 7.13 (m, 3H), 7.10 – 6.98 (m, 5H), 6.94 (d,  $J = 8.0$  Hz, 1H), 6.80 – 6.80 (m, 1H), 6.76 (d,  $J = 8.0$  Hz, 2H), 6.39 (s, 1H), 3.93 (d,  $J = 13.5$  Hz, 1H), 3.81 (d,  $J = 13.5$  Hz, 1H), 3.43 – 3.39 (m, 1H), 3.12 – 3.06 (m, 1H), 2.96 – 2.87 (m, 1H), 2.66 – 2.62 (m, 1H).

## References

- 1 J. Raushel, V. V. Fokin, Efficient Synthesis of 1-Sulfonyl-1,2,3-triazoles, *Org. Lett.* 2010, **12**, 4952.
- 2 W. L. Cheng, Y. H. Tang, Z.-F. Xu, C.-Y. Li, Synthesis of Multifunctionalized 2-Carbonylpyrrole by Rhodium-Catalyzed Transannulation of 1-Sulfonyl-1,2,3-triazole with  $\beta$ -Diketone, *Org. Lett.* 2016, **18**, 6168.
- 3 S. Rajasekar, D. Yadagiri, P. Anbarasan, One-Pot Aminoethylation of Indoles/Pyrroles with Alkynes and Sulfonyl Azides, *Chem. - Eur. J.* 2015, **21**, 17079.
- 4 E. J. Yoo, M. Ahlquist, S. H. Kim, I. Bae, V. V. Fokin, K. B. Sharpless, S. Chang, Copper-Catalyzed Synthesis of *N*-Sulfonyl-1,2,3-triazoles: Controlling Selectivity, *Angew. Chem., Int. Ed.* 2007, **46**, 1730.
- 5 R.-Q. Ran, J. He, S.-D. Xiu, K.-B. Wang, C.-Y. Li, Synthesis of 3-Pyrrolin-2-ones by Rhodium-Catalyzed Transannulation of 1-Sulfonyl-1,2,3-triazole with Ketene Silyl Acetal, *Org. Lett.* 2014, **16**, 3704.
- 6 X. Cheng, Y. H. Yu, Z. F. Mao, J. X. Chen, X. L. Huang, Facile synthesis of substituted 3-aminofurans through a tandem reaction of *N*-sulfonyl-1,2,3-triazoles with propargyl alcohols, *Org. Biomol. Chem.* 2016, **14**, 3878.
- 7 T. Miura, Q. Zhao, M. Murakami, elective Functionalization of Aromatic C(sp<sup>2</sup>)-H Bonds in the Presence of Benzylic C(sp<sup>3</sup>)-H Bonds by Electron-Deficient Carbenoids Generated from 4-Acyl-1-Sulfonyl-1,2,3-Triazoles, *Angew. Chem., Int. Ed.* 2017, **56**, 16645.
- 8 D. Singh, O. Silakari, Sodium hydrogen exchanger inhibitory activity of benzotriazole derivatives, *Eur. J. Med. Chem.* 2017, **126**, 183.
- 9 H. X. Ding, S. G. Hong, N. Zhang, Rhodium(II)-catalyzed transannulation of 1-sulfonyl-1,2,3-triazoles with 2*H*-azirines: a new method to dihydropyrazines, *Tetrahedron Letters* 2015, **56**, 507.
- 10 N. Selander, B. T. Worrell, V. V. Fokin, Ring Expansion and Rearrangements of Rhodium(II) Azavinyl Carbenes, *Angew. Chem., Int. Ed.* 2012, **51**, 13054.
- 11 T. Miura, T. Biyajima, T. Fujii, M. Murakami, Synthesis of  $\alpha$ -Amino Ketones from Terminal Alkynes via Rhodium-Catalyzed Denitrogenative Hydration of *N*-Sulfonyl-1,2,3-triazoles, *J. Am. Chem. Soc.* 2012, **134**, 194.
- 12 A. Guarnieri-Ibáñez, F. Medina, C. Besnard, S. L. Kidd, D. R. Spring, J. Lacour, Diversity-oriented synthesis of heterocycles and macrocycles by controlled reactions of oxetanes with  $\alpha$ -iminocarbenes, *Chem. Sci.* 2017, **8**, 5713.
- 13 G. E. Keck, J. B. Yates, Carbon-carbon bond formation via the reaction of trialkylallylstannanes with organic halides, *J. Am. Chem. Soc.* 1982, **104**, 5829.
- 14 H. Aruri, U. Singh, S. Sharma, S. Gudup, M. Bhogal, S. Kumar, D. Singh, V. K. Gupta, R. Kant, R. A. Vishwakarma, P. P. Singh, Cross-Dehydrogenative Coupling of Azoles with  $\alpha$ -C(sp<sup>3</sup>)-H of Ethers and Thioethers under Metal-Free Conditions: Functionalization of H-N Azoles via C-H Activation, *J. Org. Chem.* 2015, **80**, 1929.
- 15 L. L. Zhang, H. Yi, J. Wang, A. W. Lei, Visible-Light Mediated Oxidative C-H/N-H Cross-Coupling between Tetrahydrofuran and Azoles Using Air, *J. Org. Chem.* 2017, **82**, 10704.
- 16 J. W. Wu, Y. Zhou, Y. C. Zhou, C.-W. Chiang, A. W. Lei, Electro-oxidative C(sp<sup>3</sup>)-H Amination of Azoles via Intermolecular Oxidative C(sp<sup>3</sup>)-H/N-H Cross-Coupling, *ACS Catal.* 2017, **7**, 8320.
- 17 P. L. Bao, H. L. Yue, N. Meng, X. H. Zhao, J. S. Li, W. Wei, Copper-Catalyzed Three-Component Reaction of Alkynes, TMSN<sub>3</sub>, and Ethers: Regiocontrollable Synthesis of *N*<sup>1</sup>- and *N*<sup>2</sup>-Oxyalkylated 1,2,3-Triazoles, *Org. Lett.* 2019, **21**, 7218.
- 18 A. R. Katritzky, T.-B. Huang, P. J. Steel, Dibenzo[*b,h*][1,4,7]thiadiazonines: Examples of a Novel Ring System, *J. Org. Chem.* 2001, **66**, 5601.
- 19 J. Y. Dong, Q. Xia, C. C. Yan, H. J. Song, Y. X. Liu, Q. M. Wang, C(sp<sup>3</sup>)-H Azidation Reaction: A Protocol for Preparation of Aminals, *J. Org. Chem.* 2018, **83**, 4516.
- 20 J. Guo, Y. Xie, Q.-L. Wu, W.-T. Zeng, A. S. C. Chan, J. Weng, G. Lu, Copper-catalyzed aerobic decarboxylative coupling between cyclic  $\alpha$ -amino acids and diverse C-H nucleophiles with low catalyst loading, *RSC Adv.* 2018, **8**, 16202.



# Copies of NMR spectra

4a

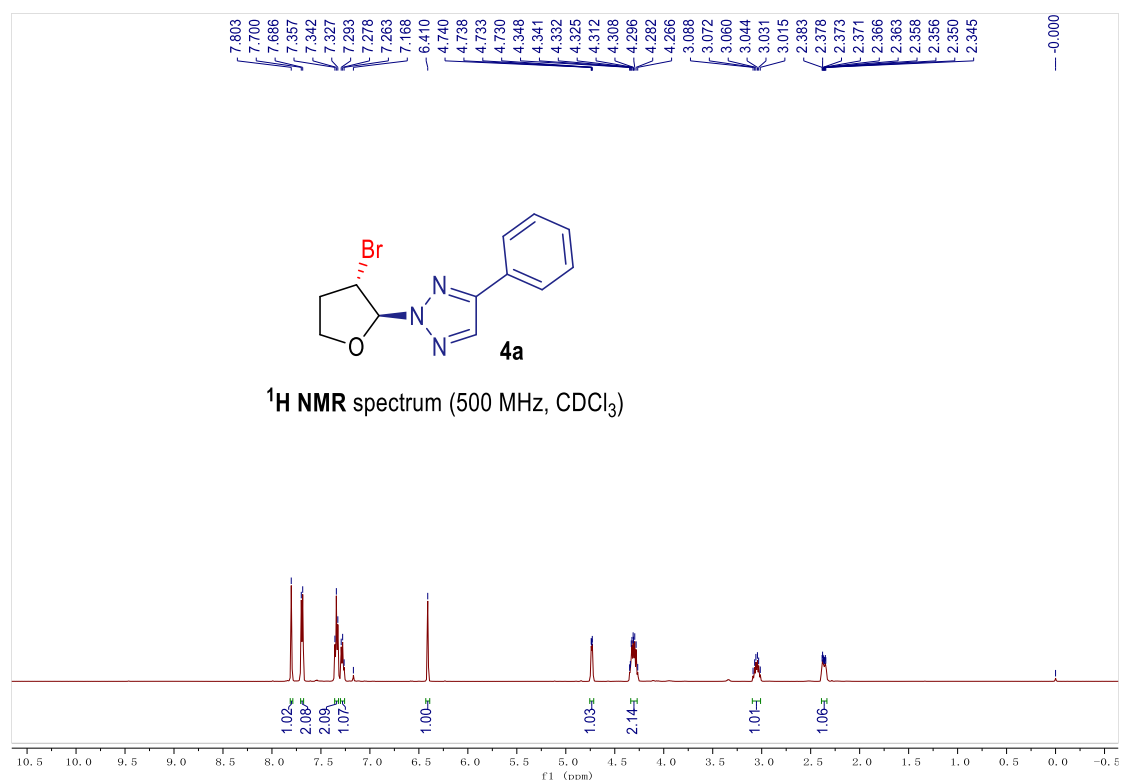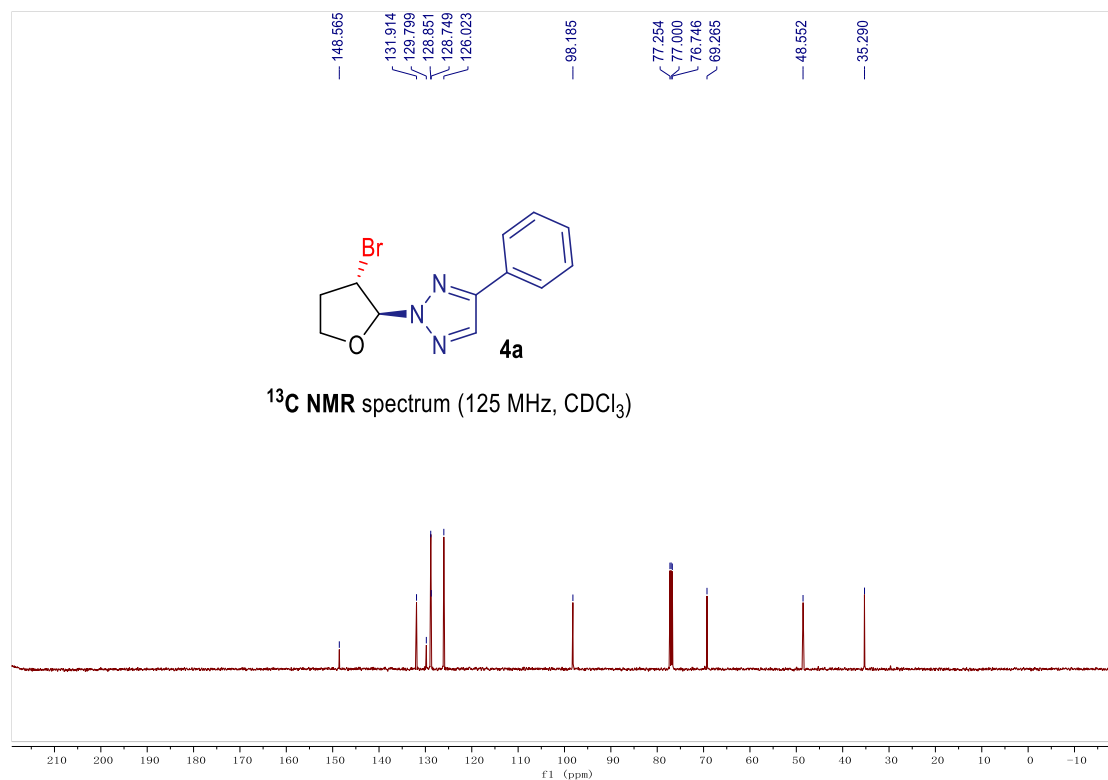

4b

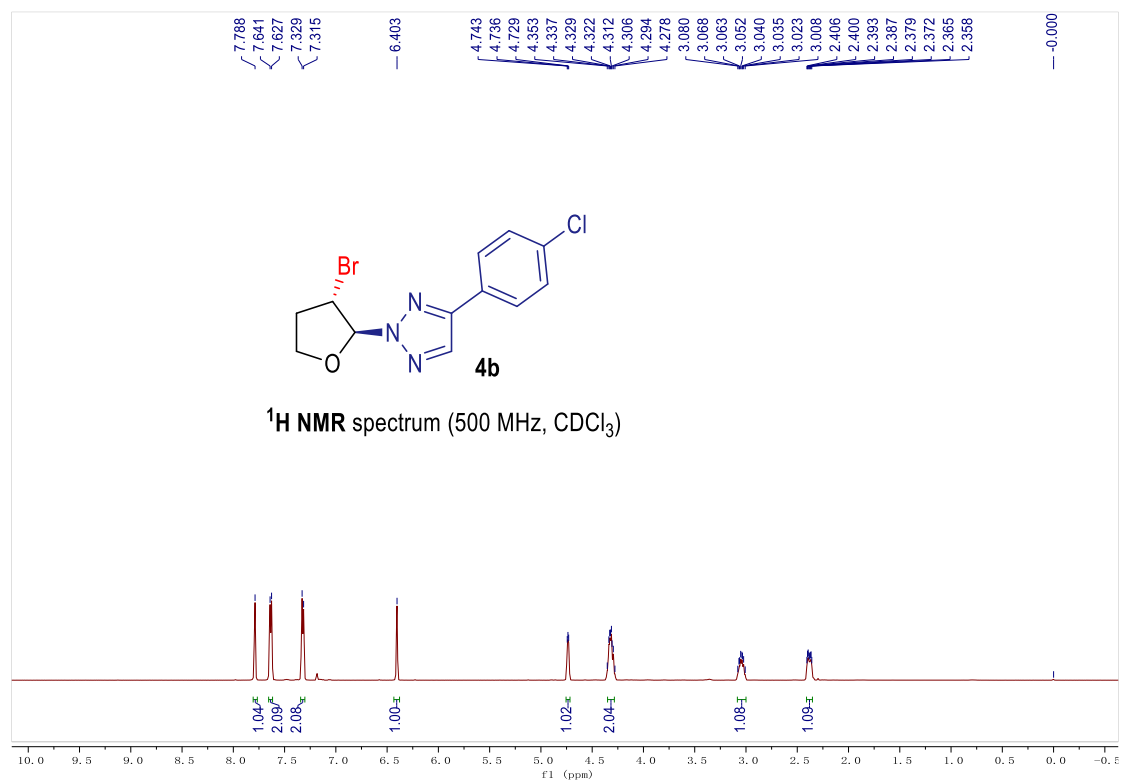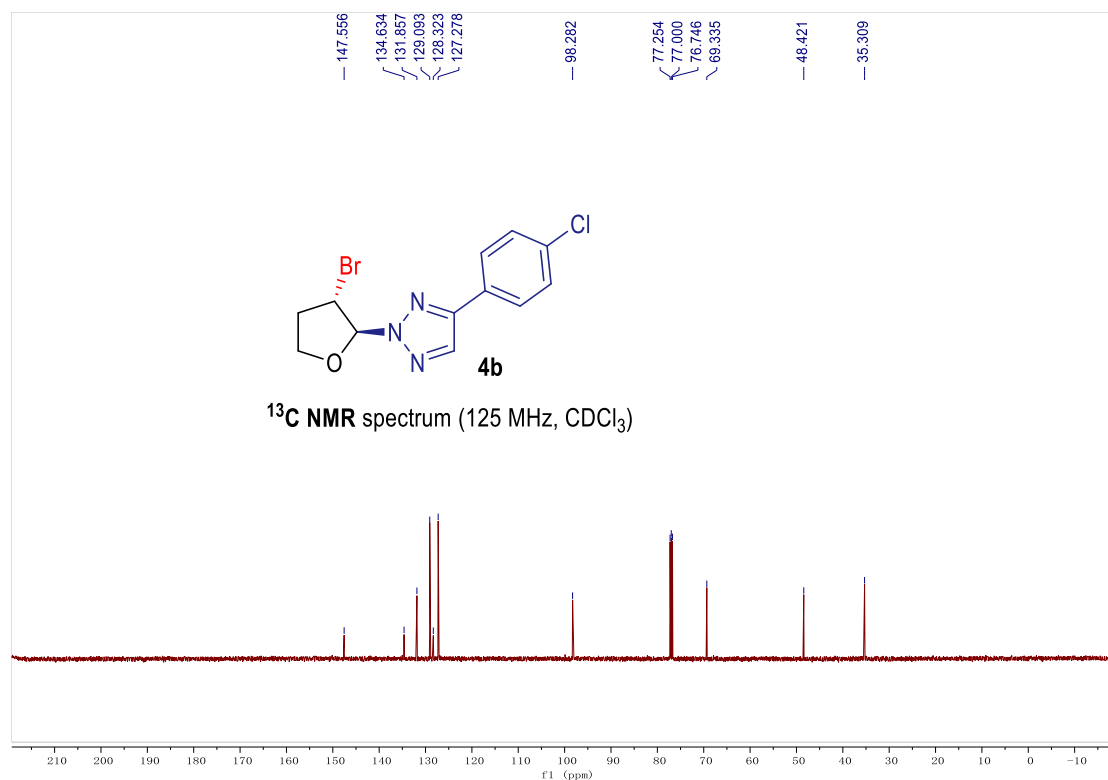

**4c**

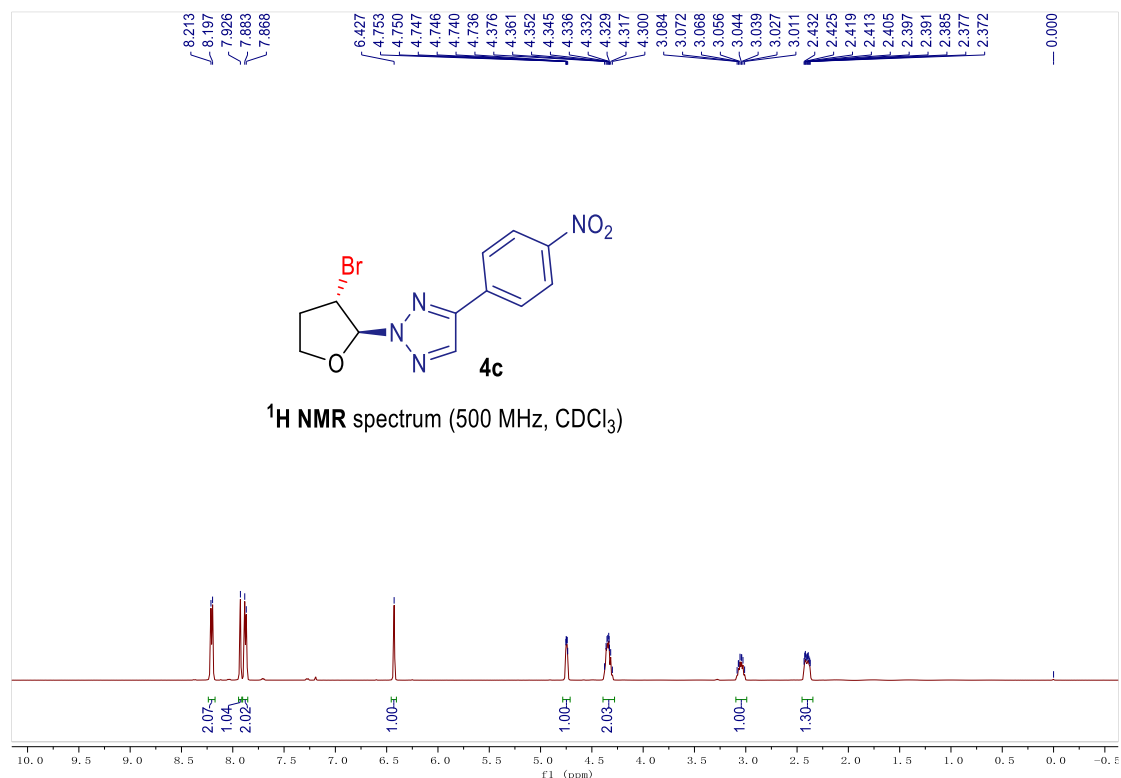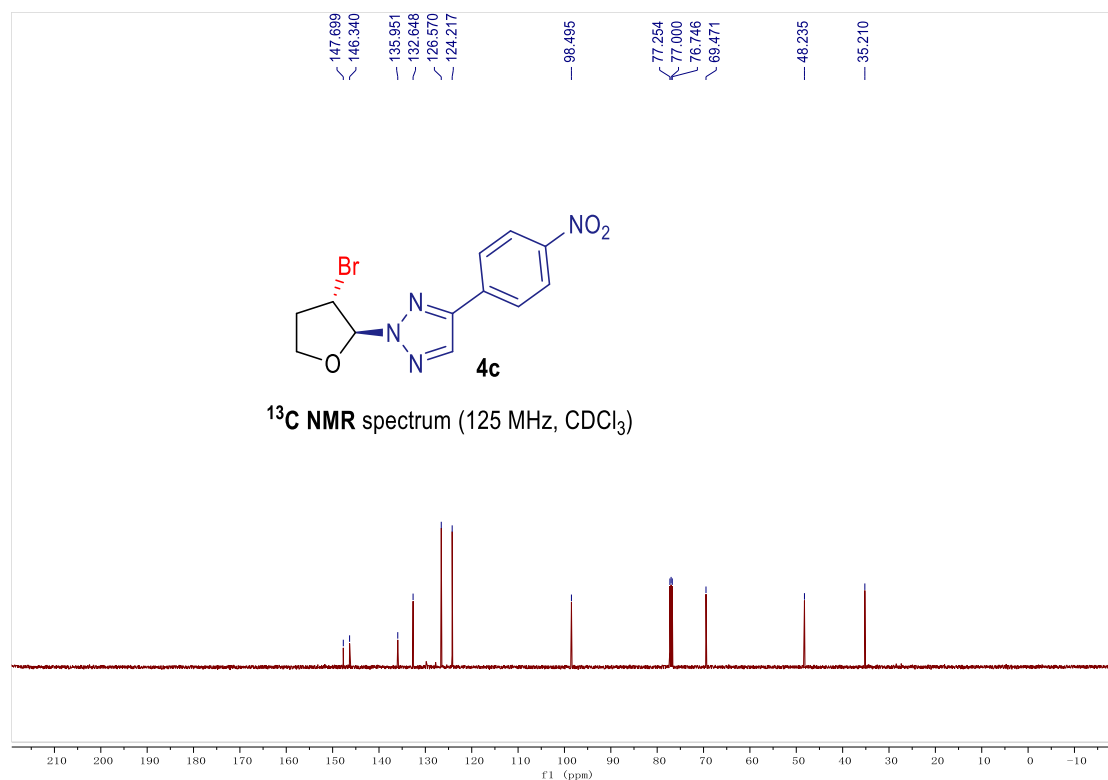

4d

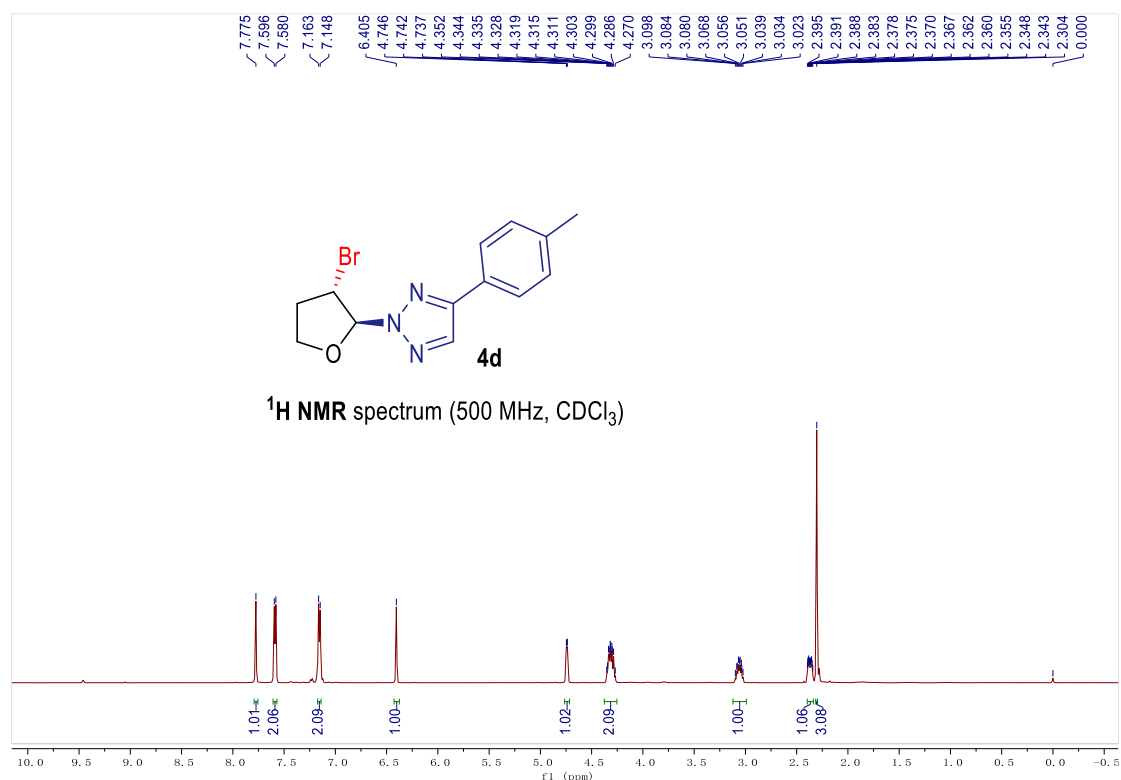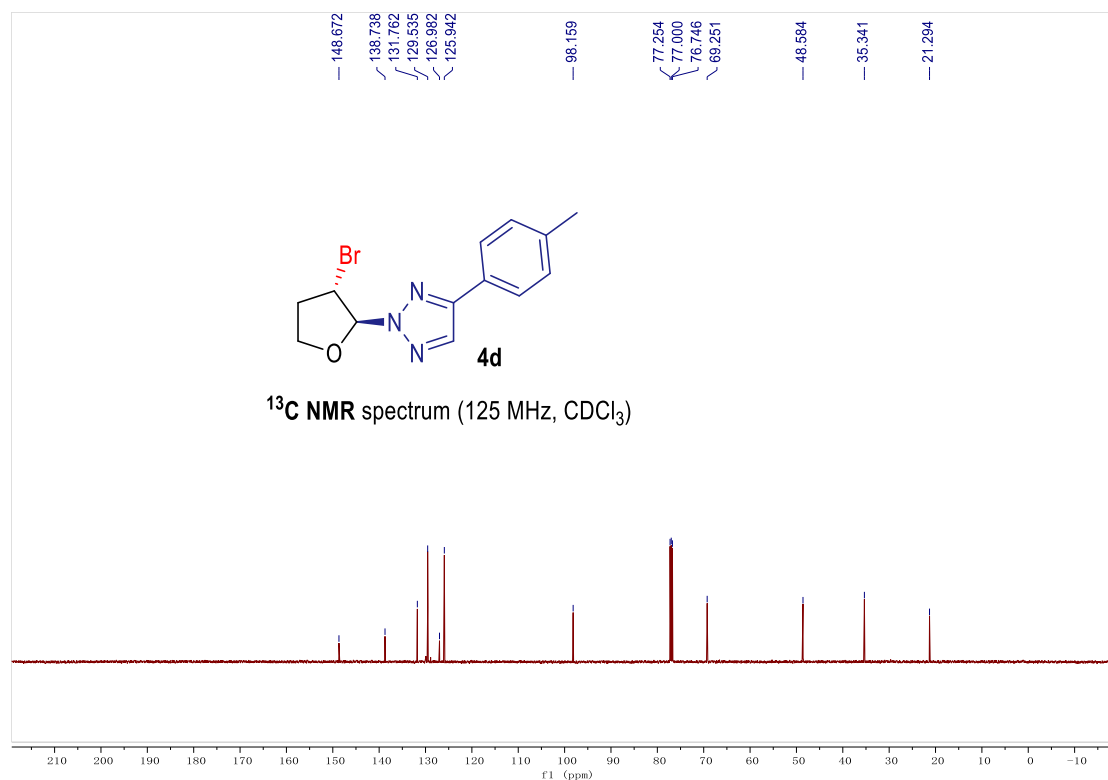

4e

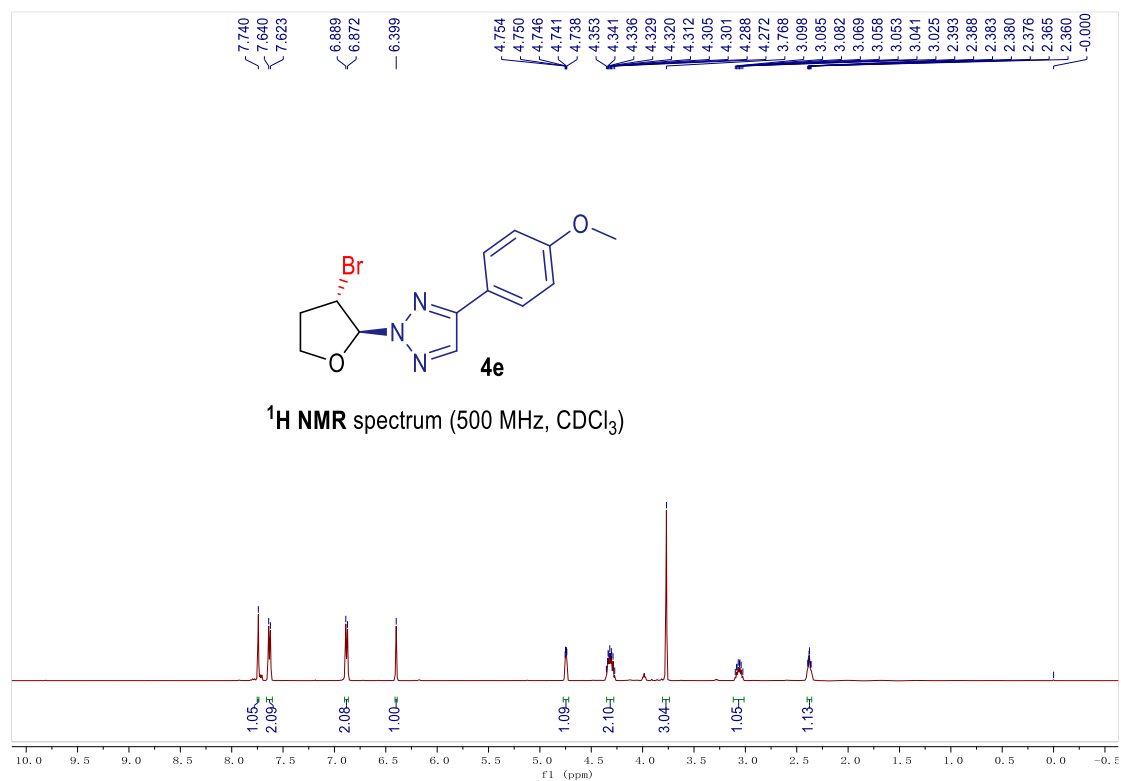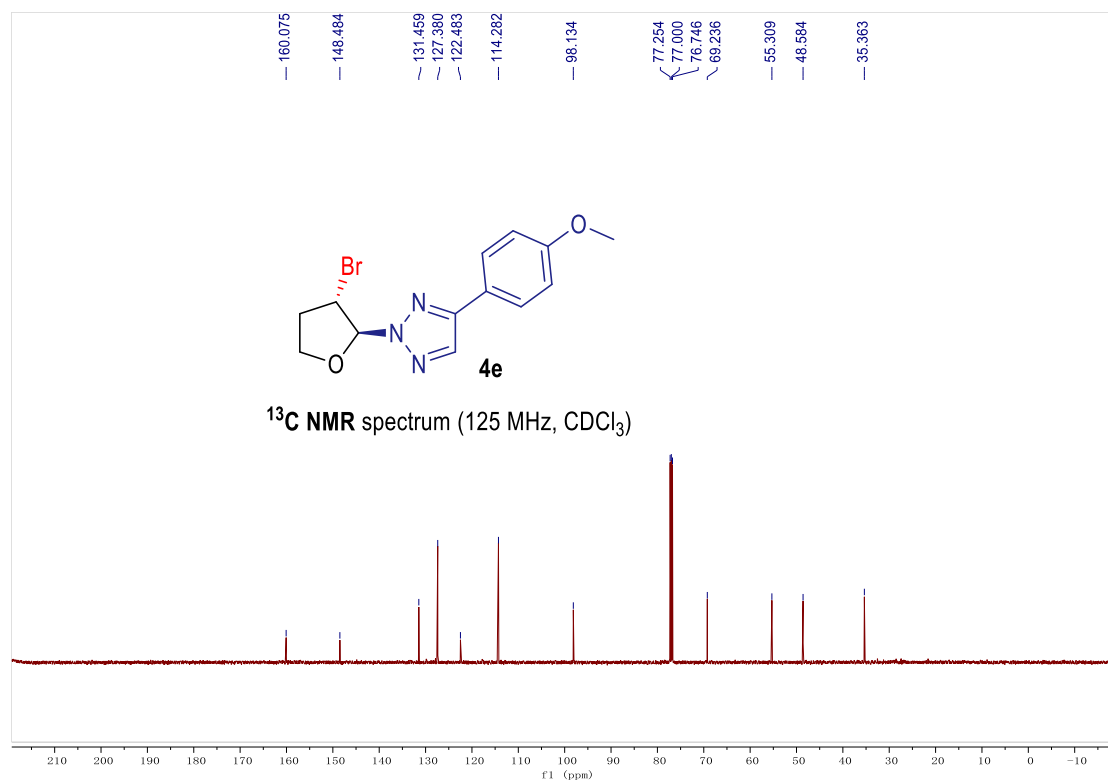

4f

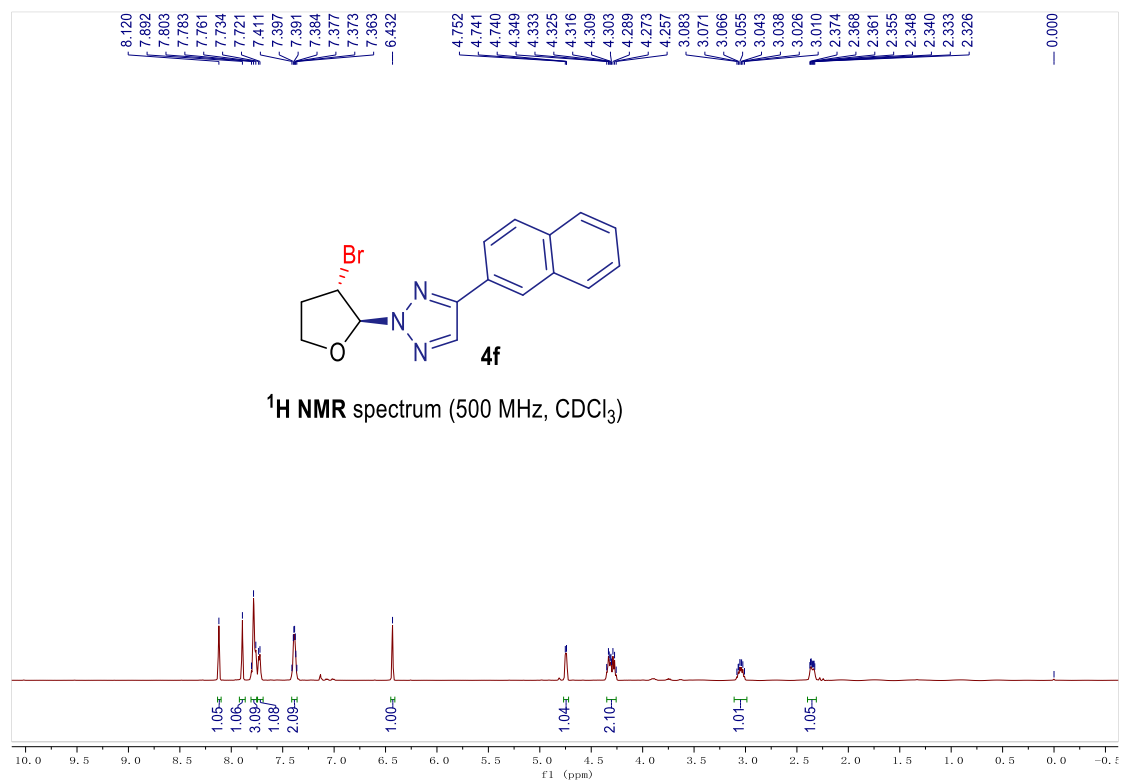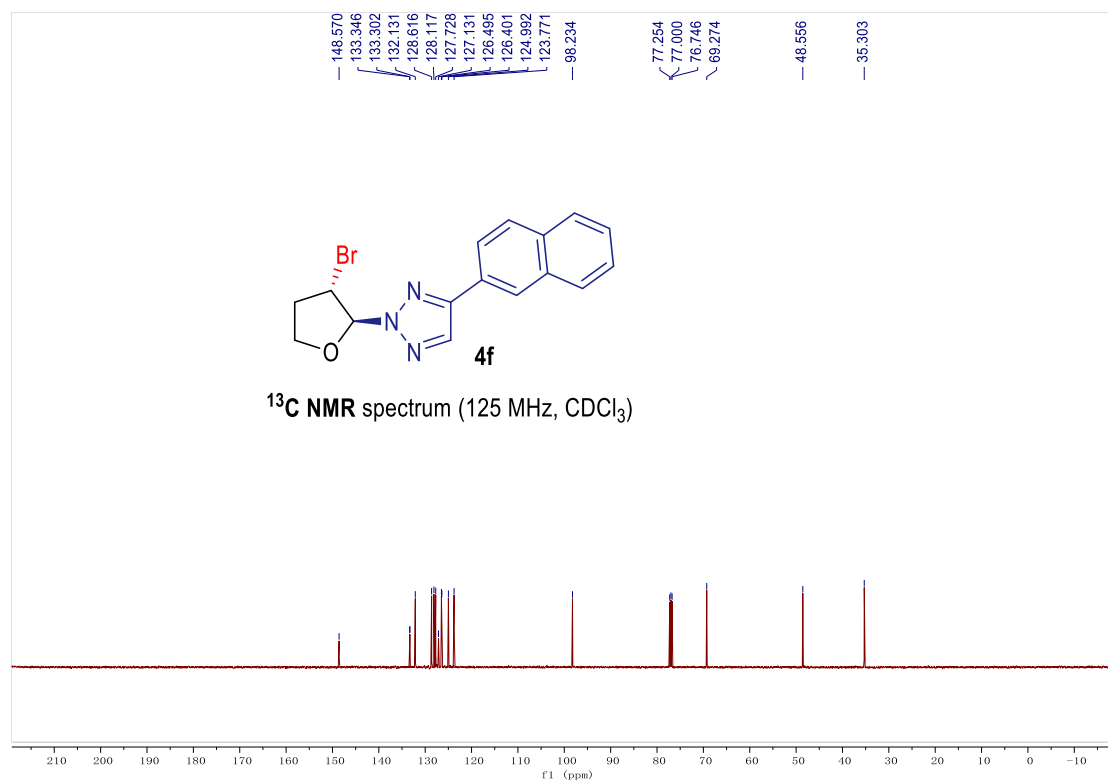

**4g**

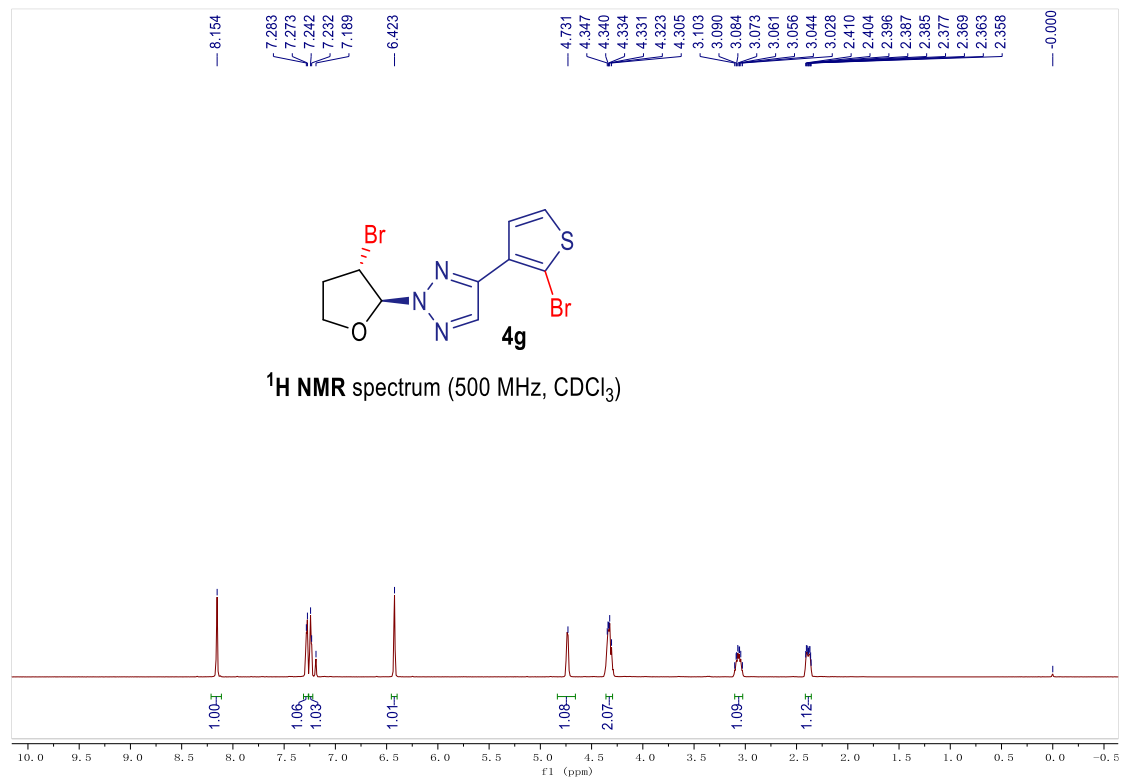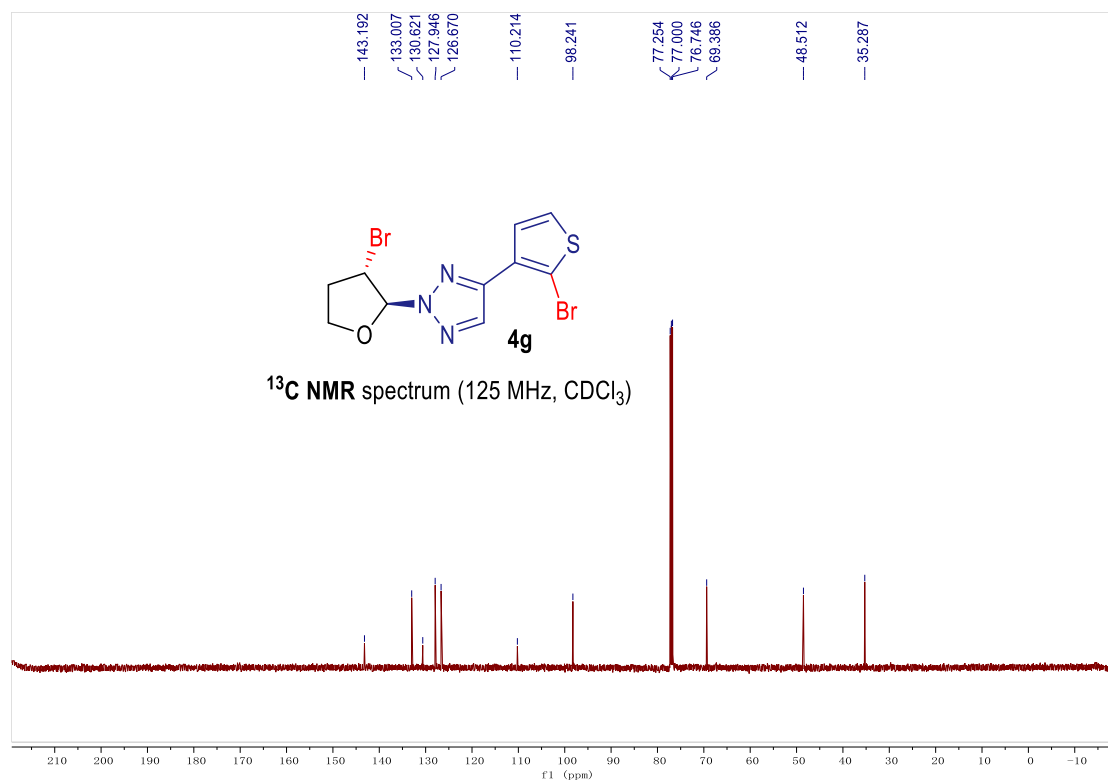

**4h : 4h' = 1 : 1**

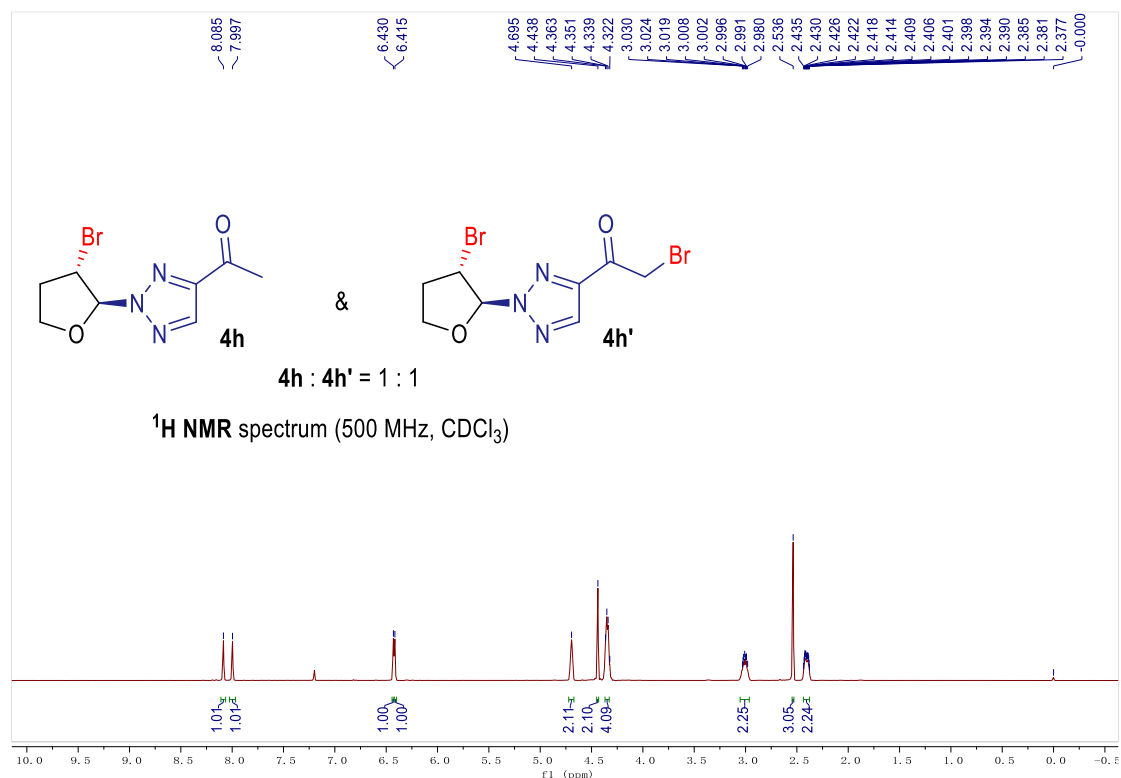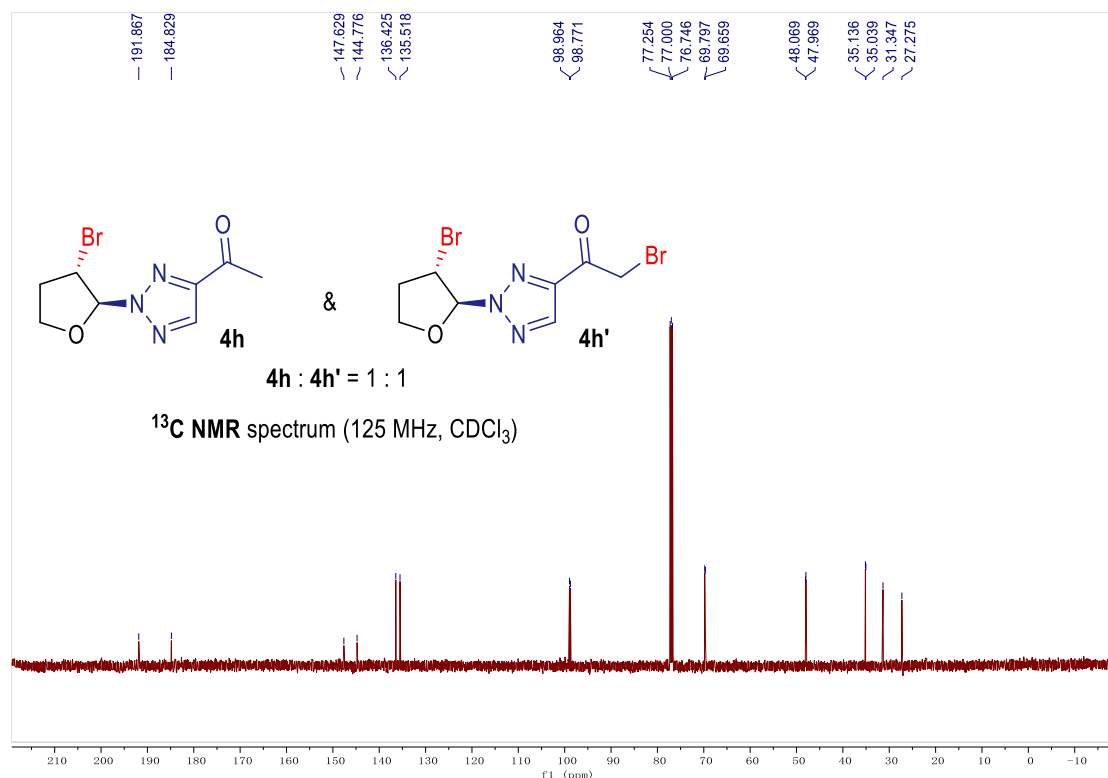



4i

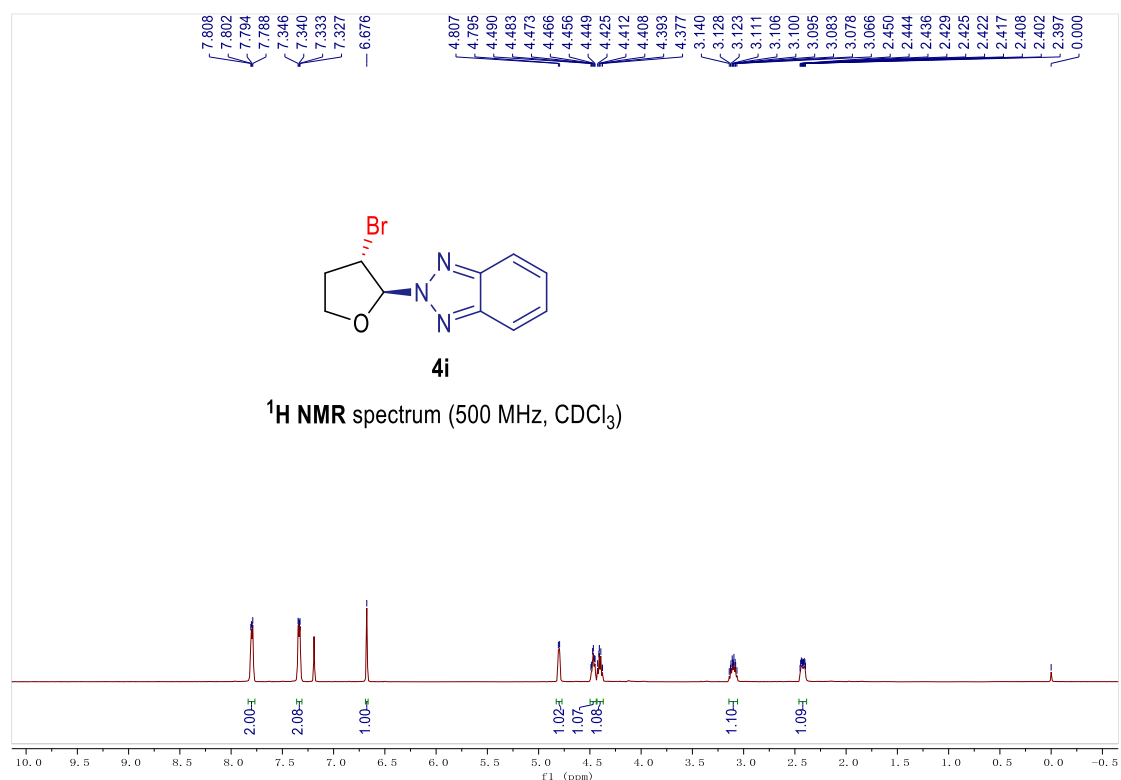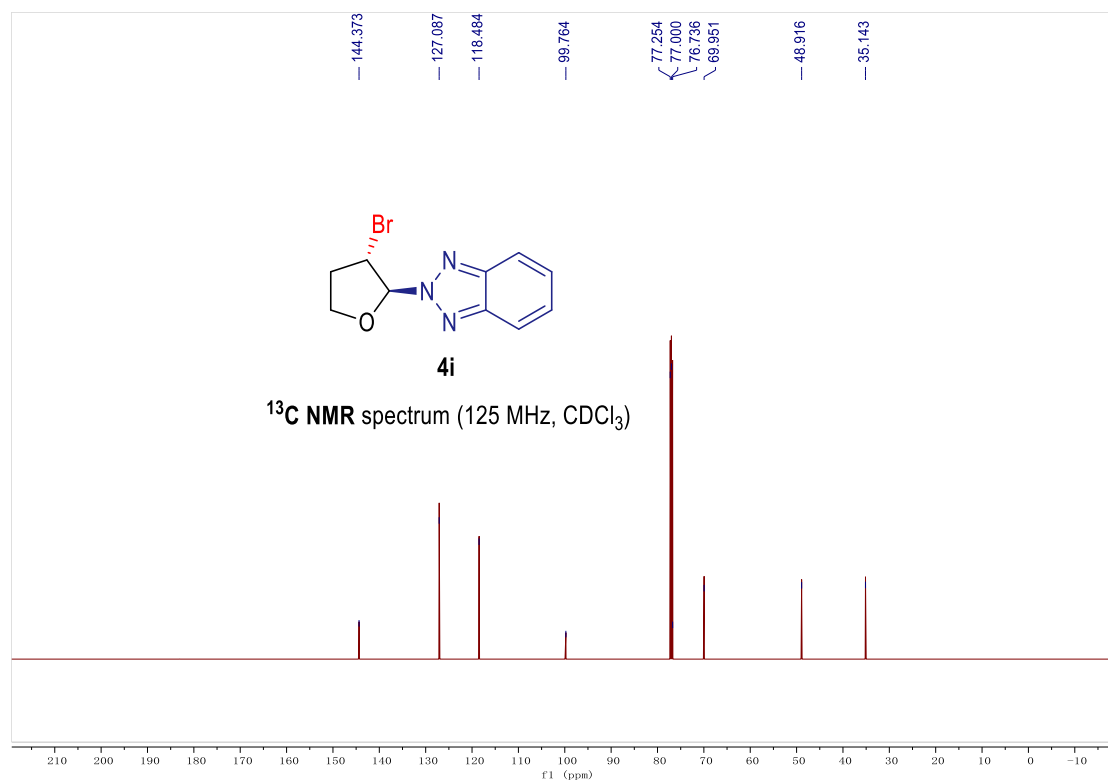

4j

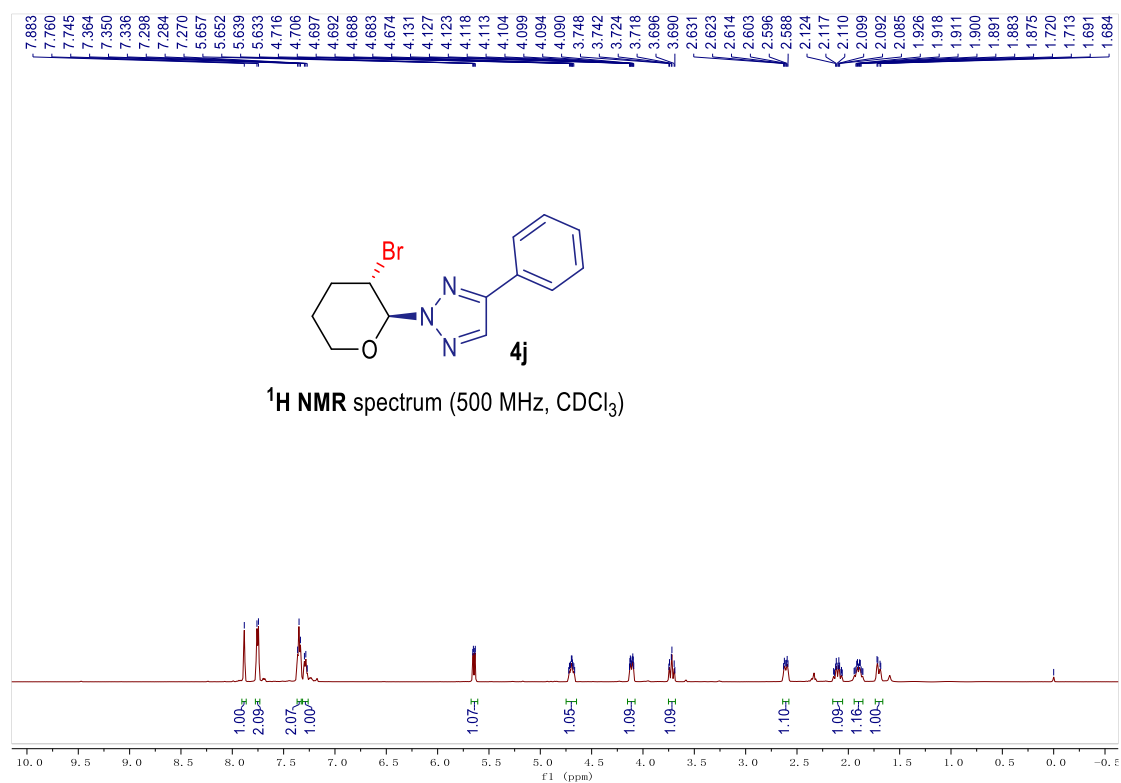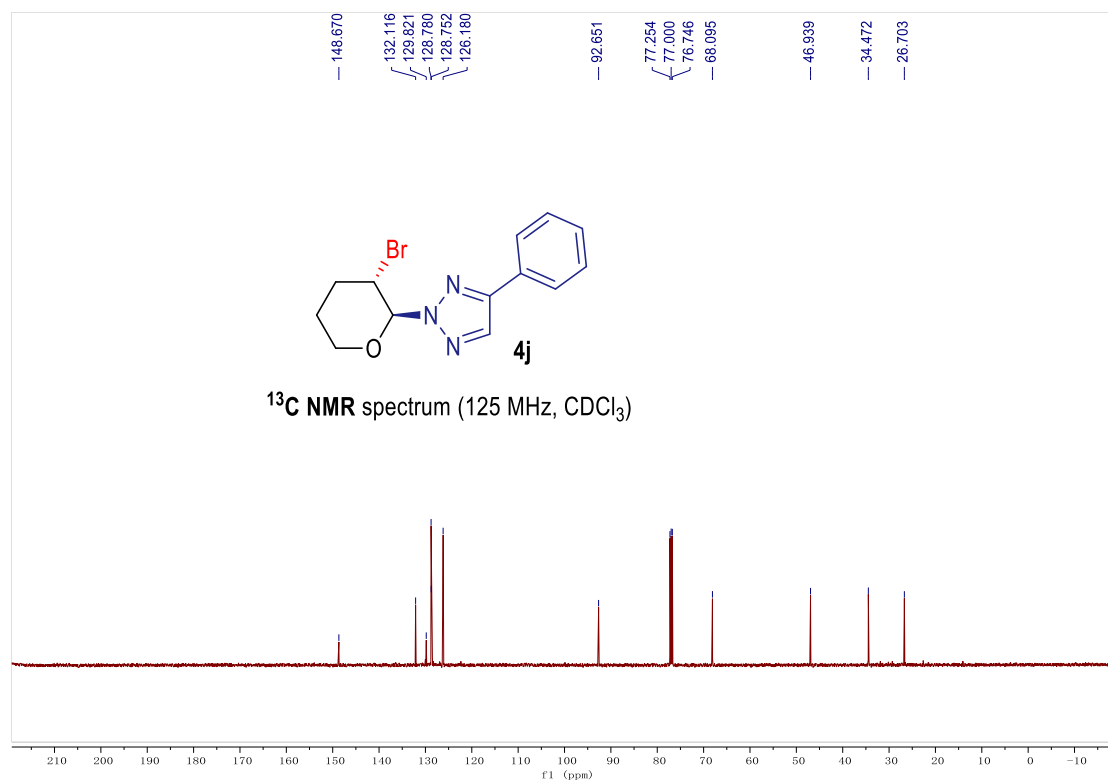

**4k**

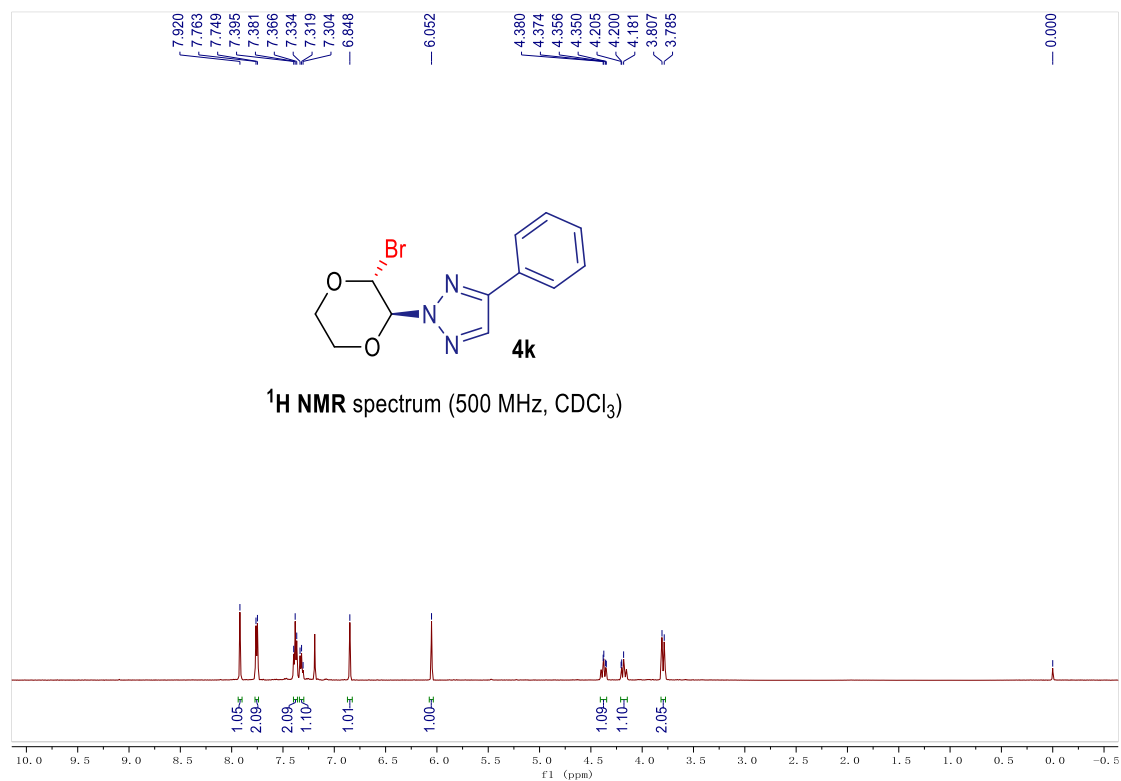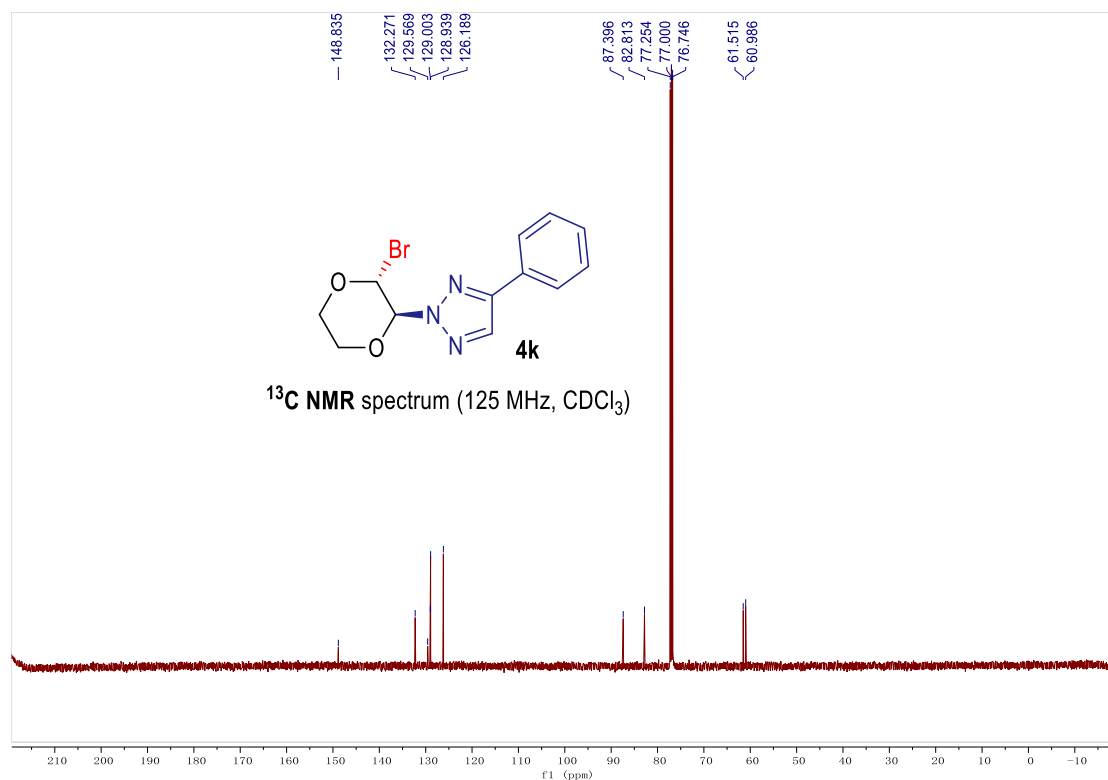

4l

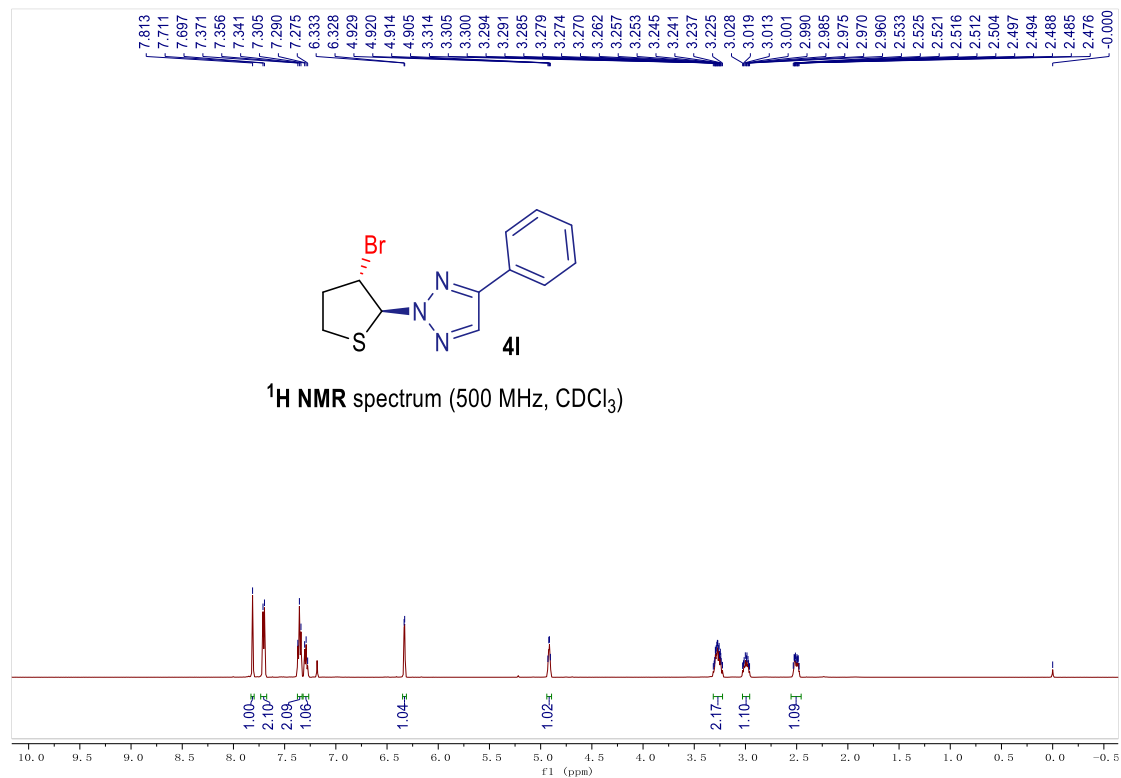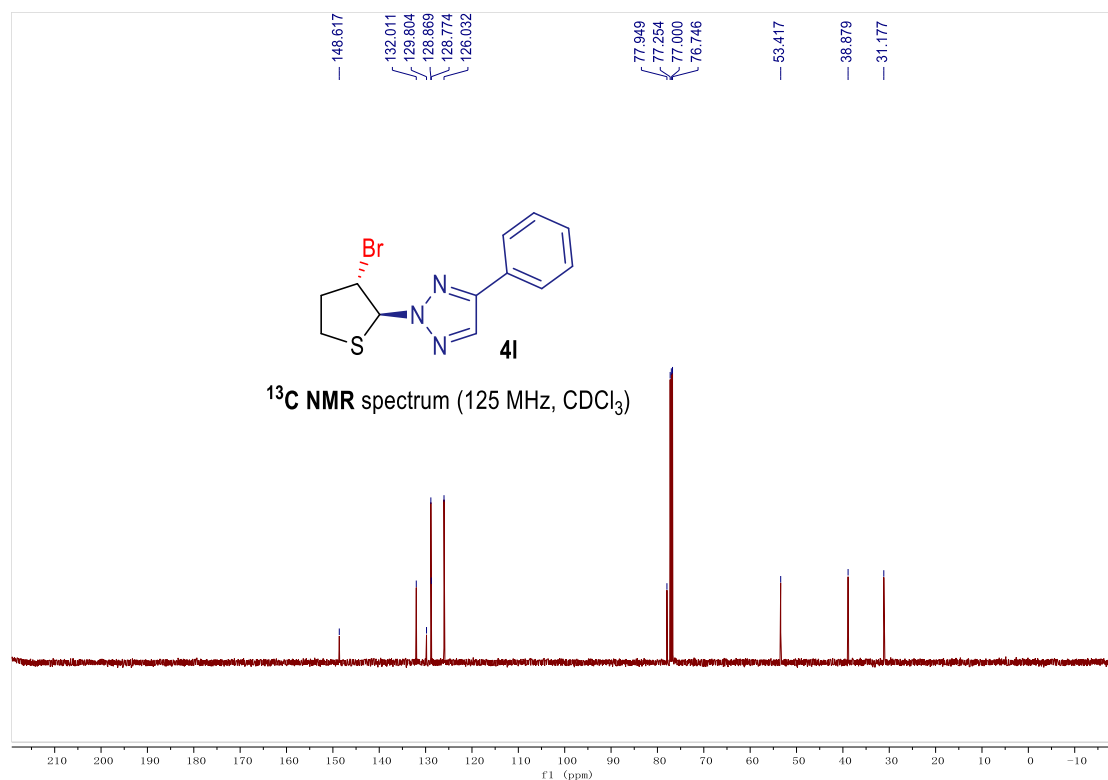

4m

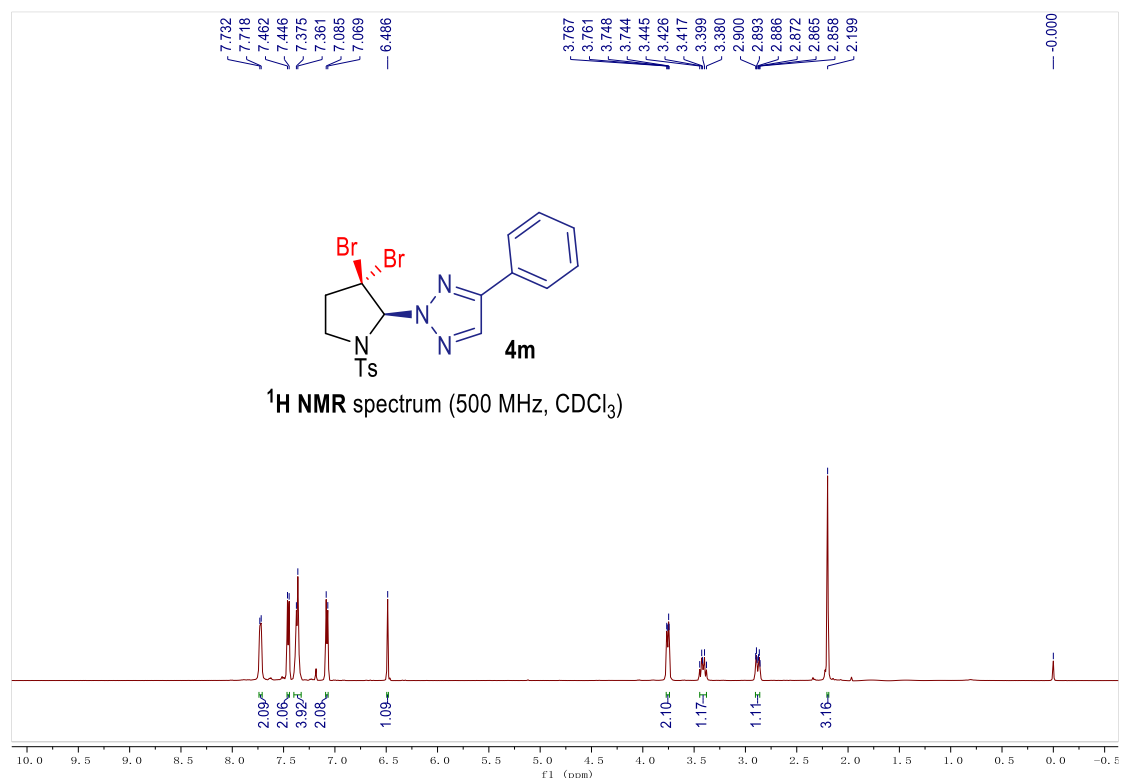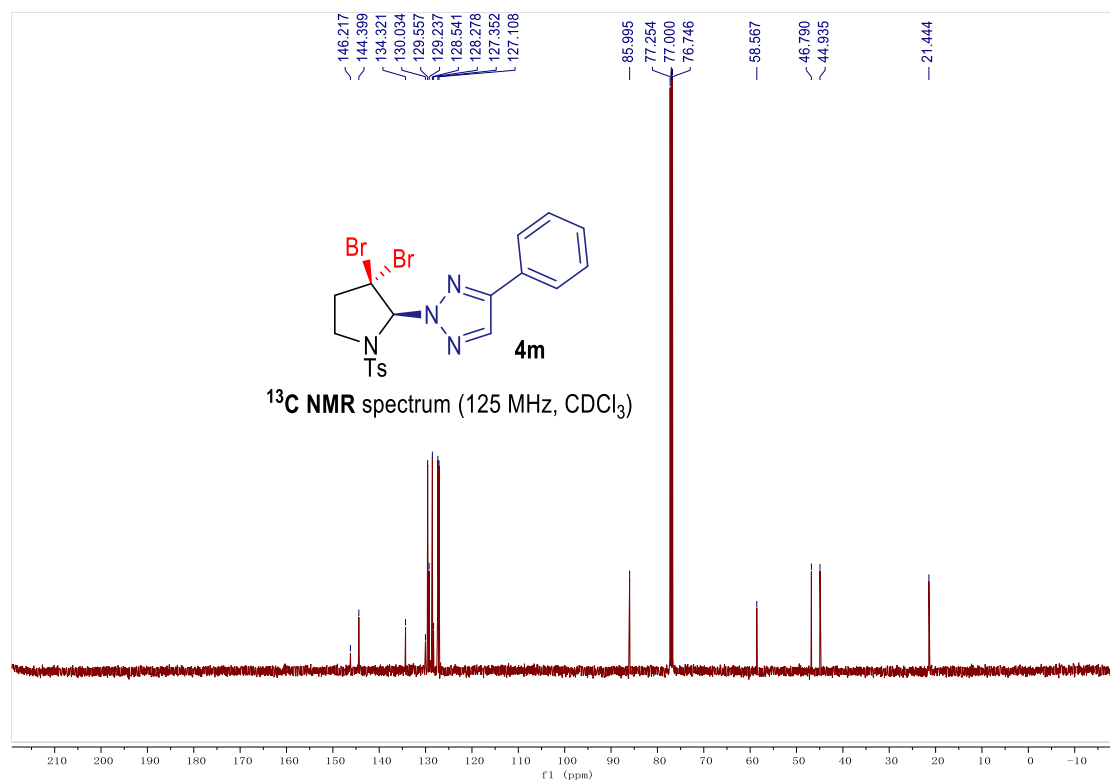

4n

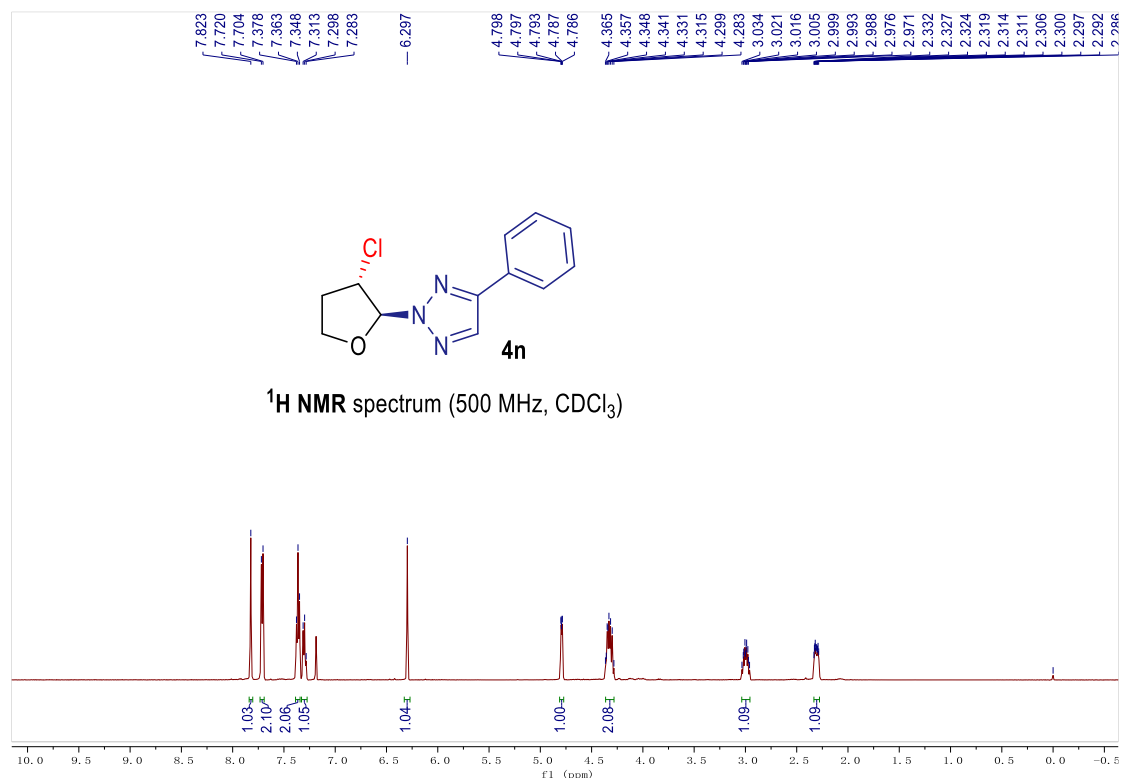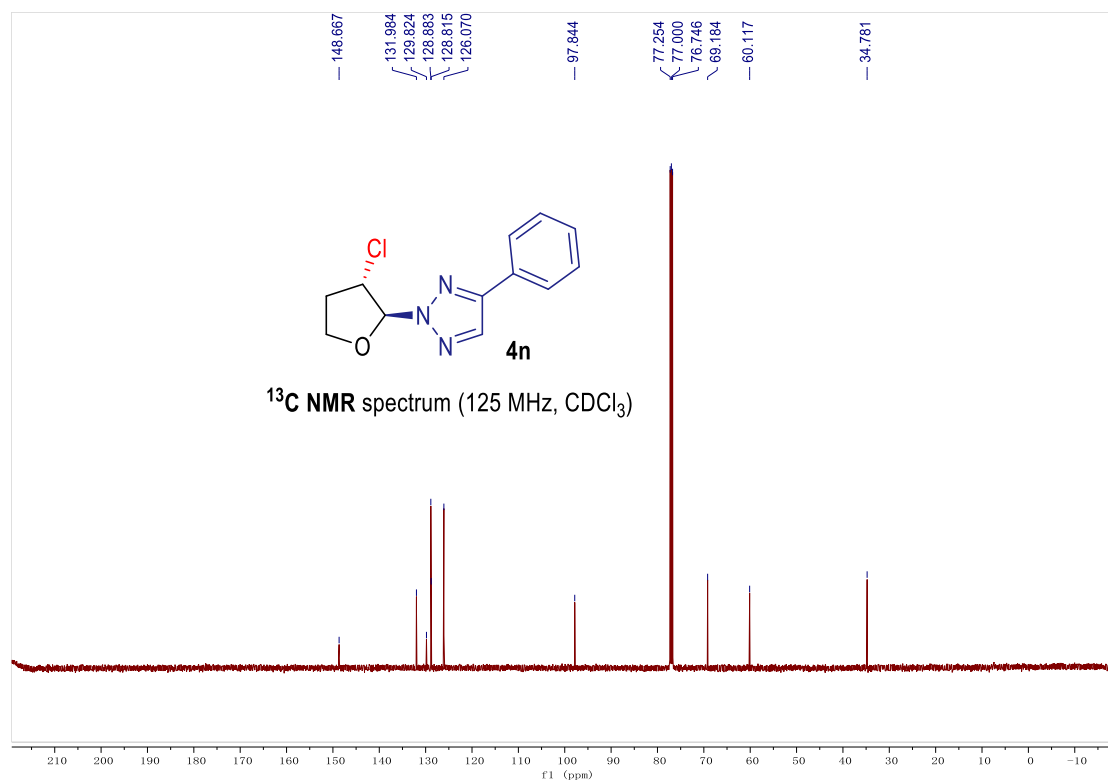

**4o**

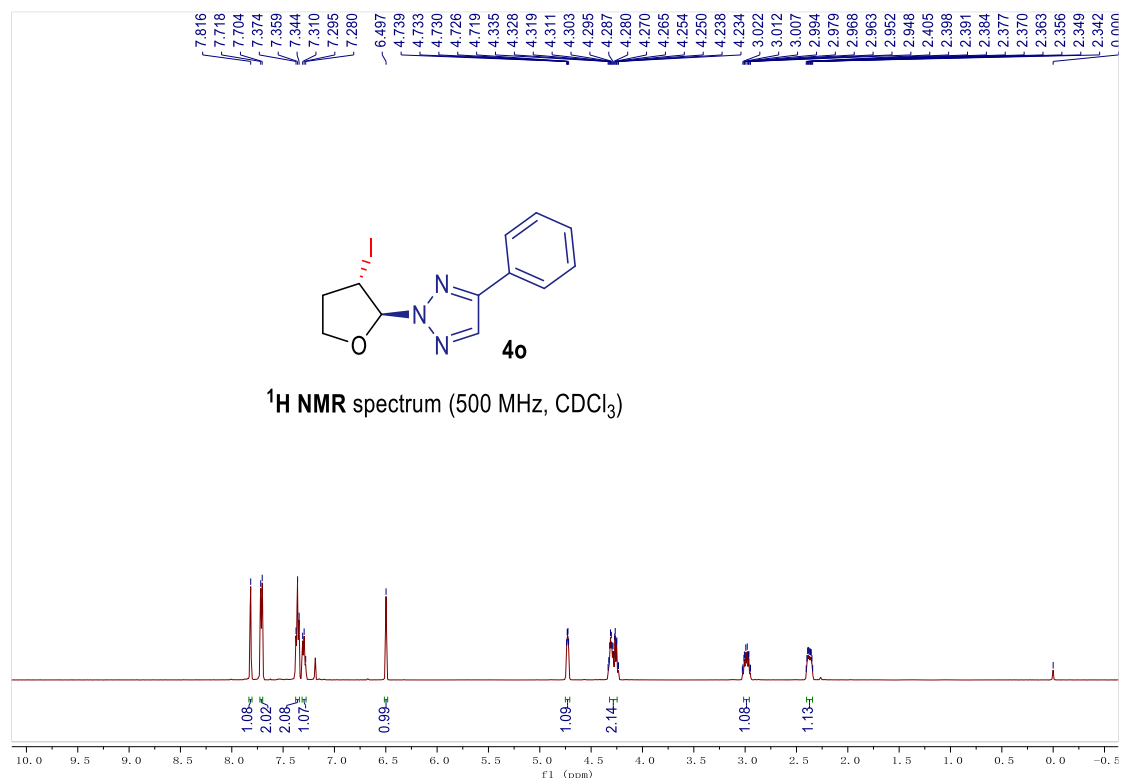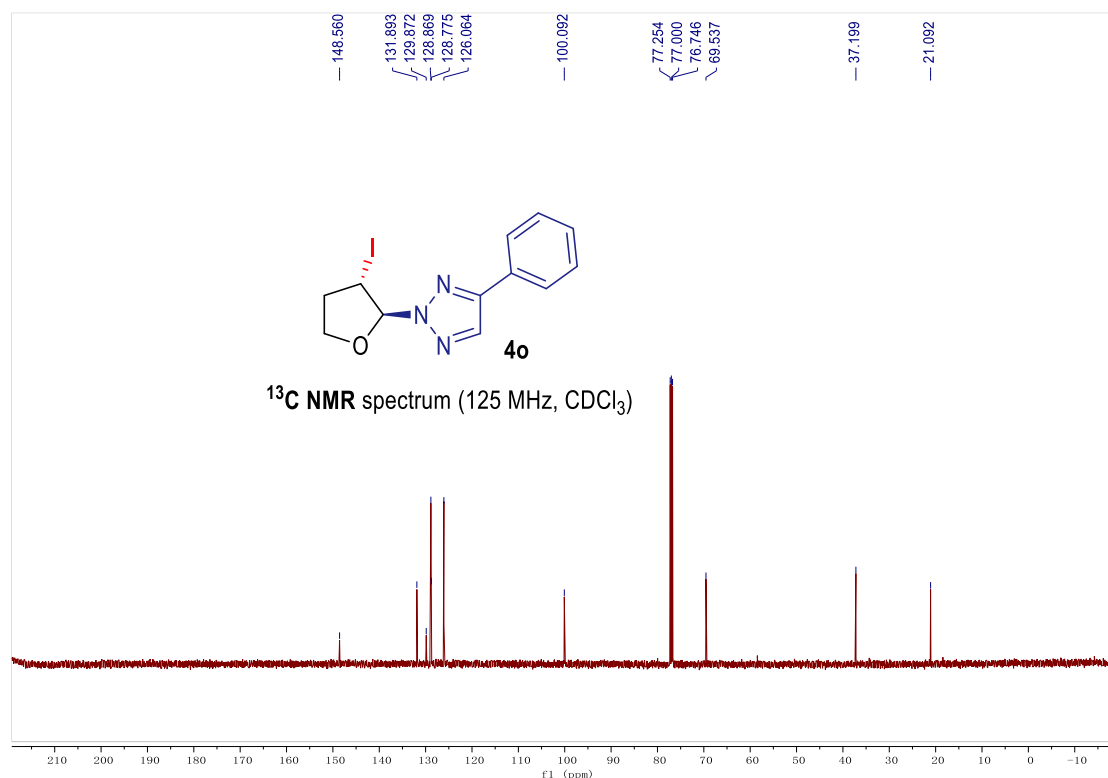

4p

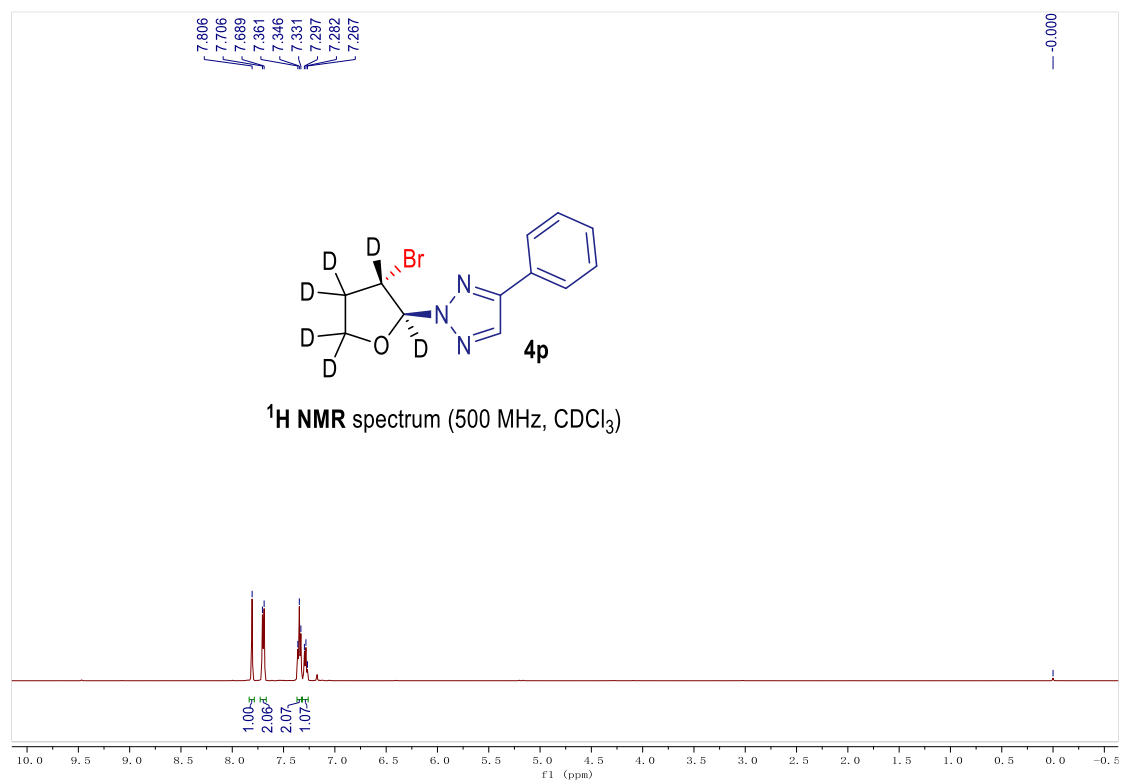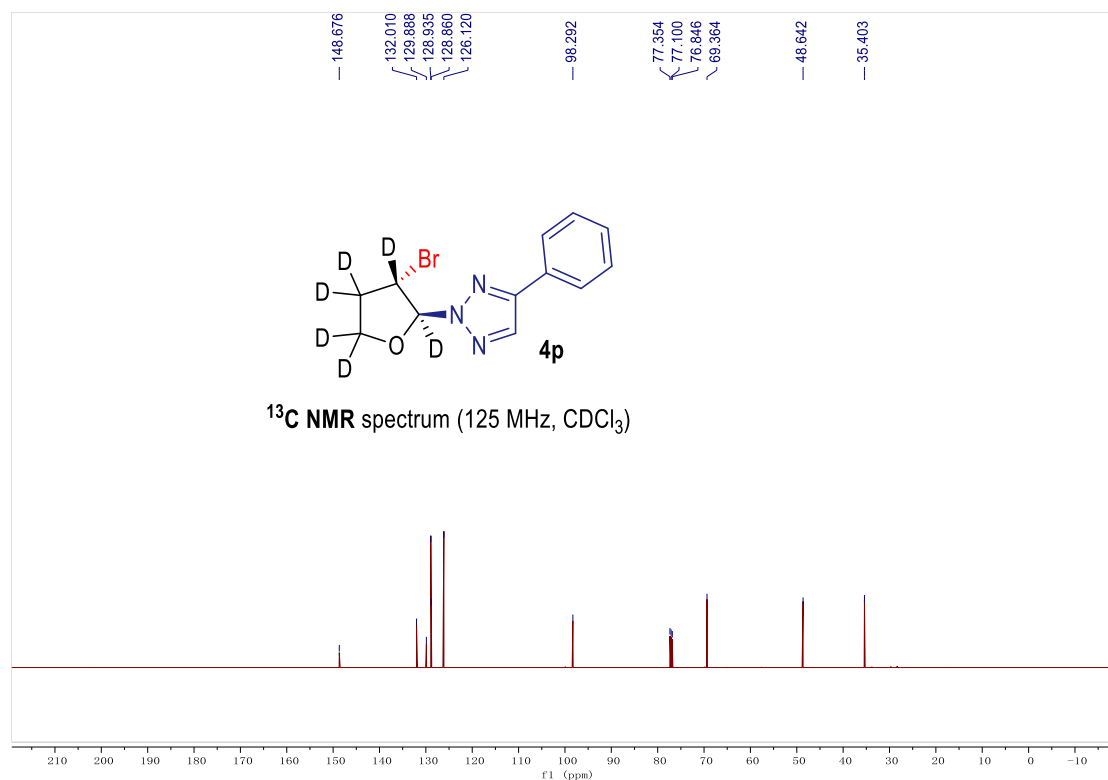



5f

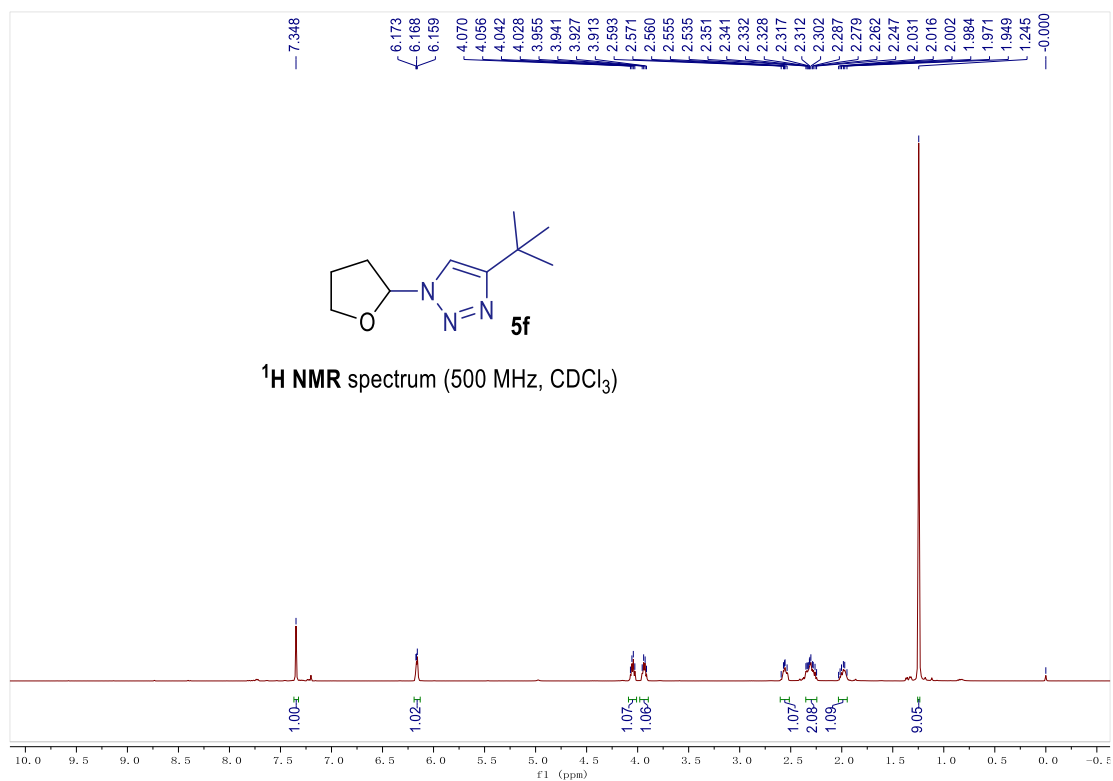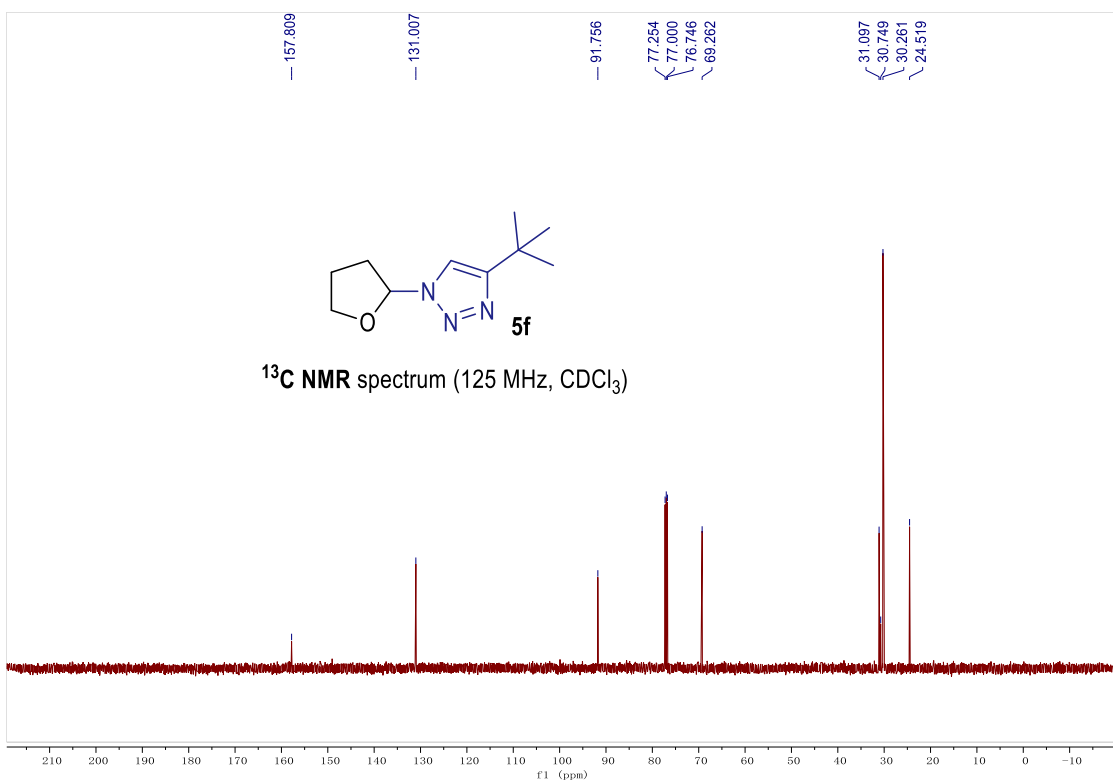

5h

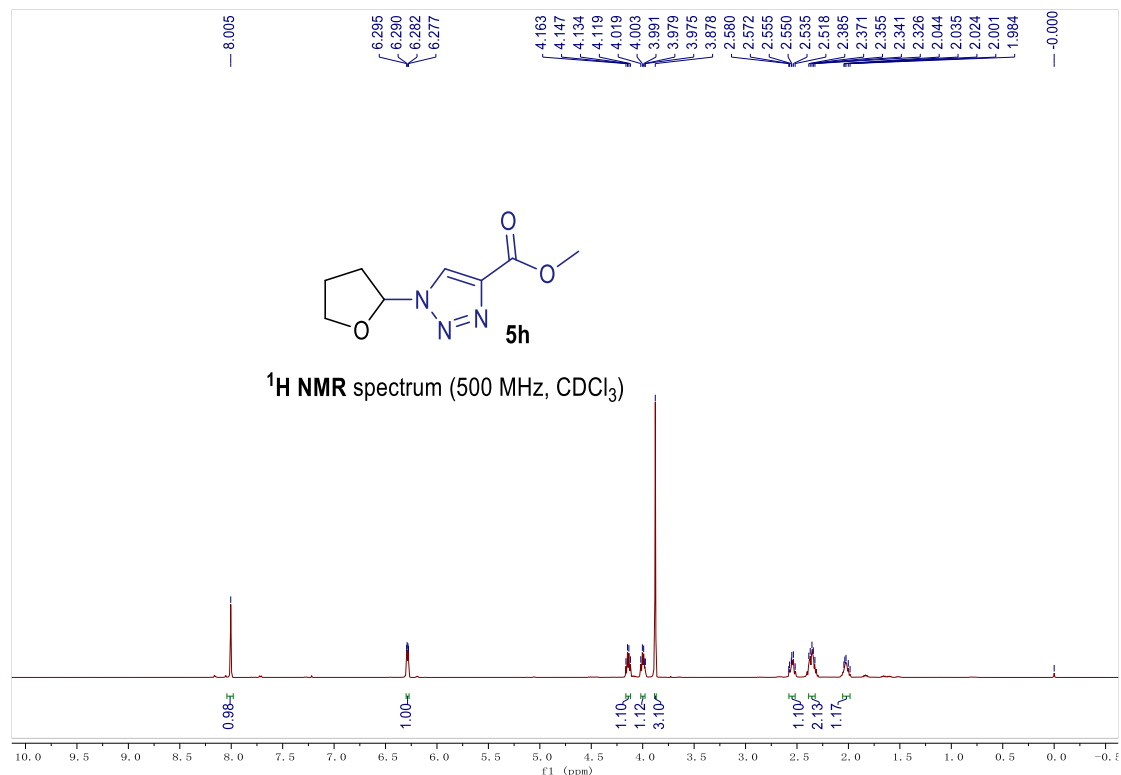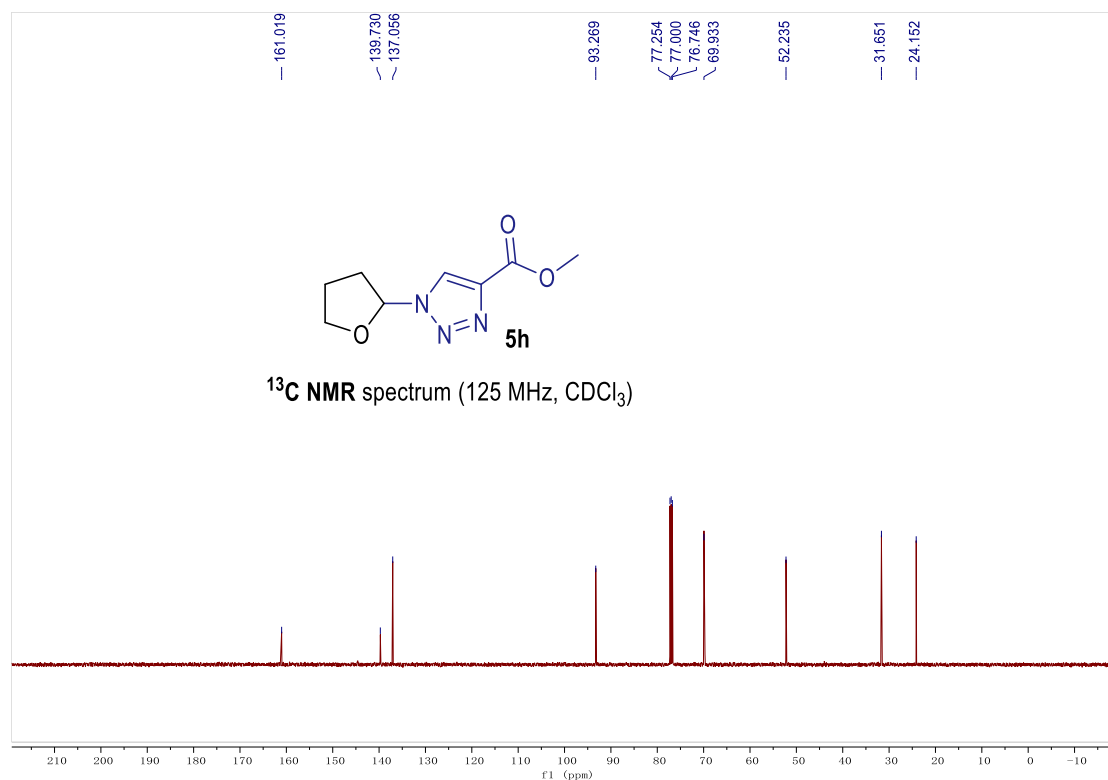

**5k**

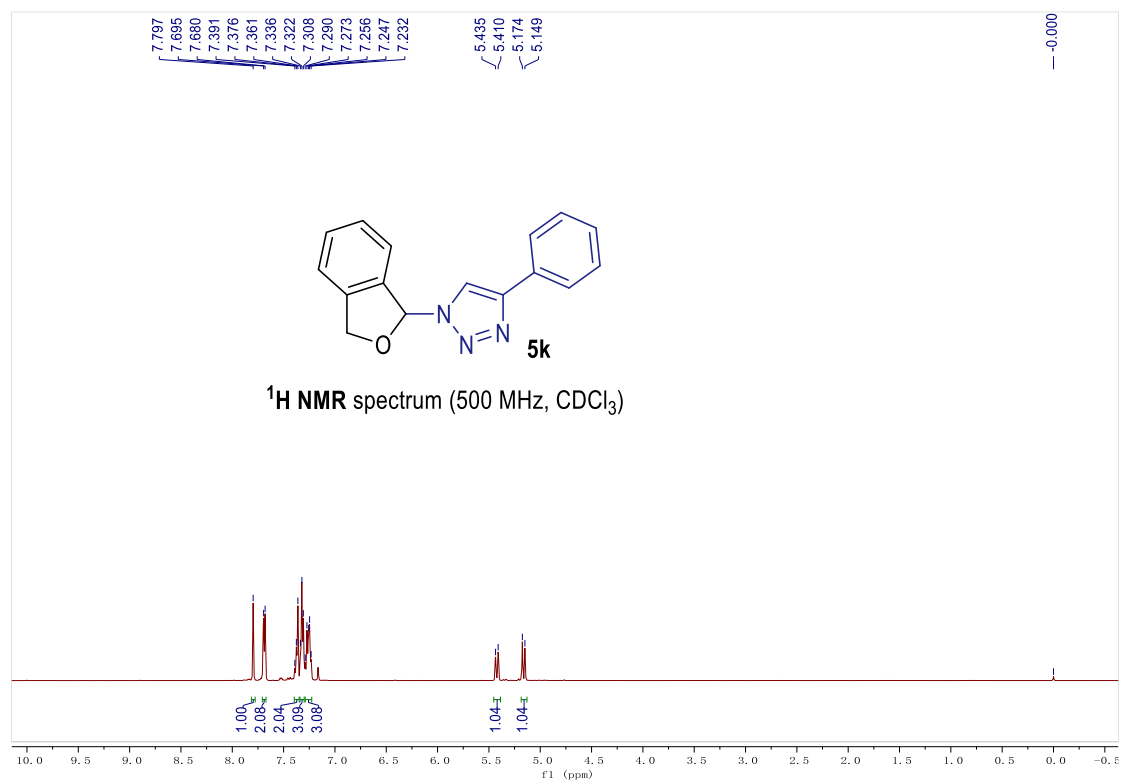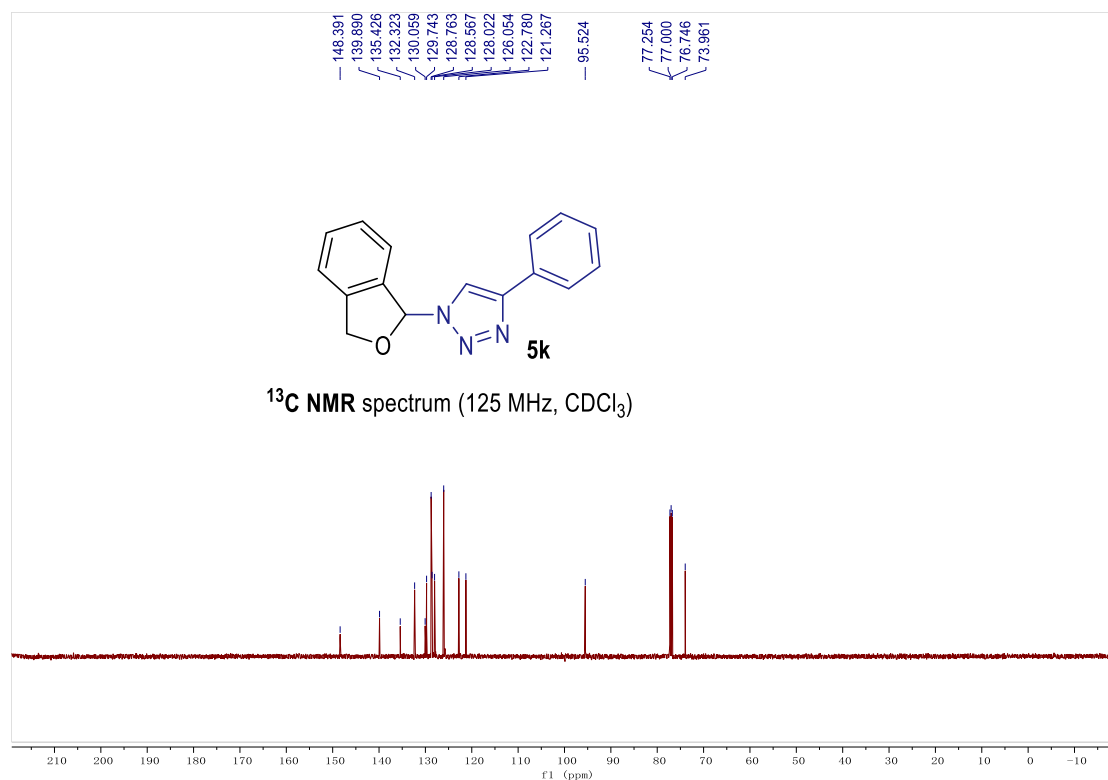

5m

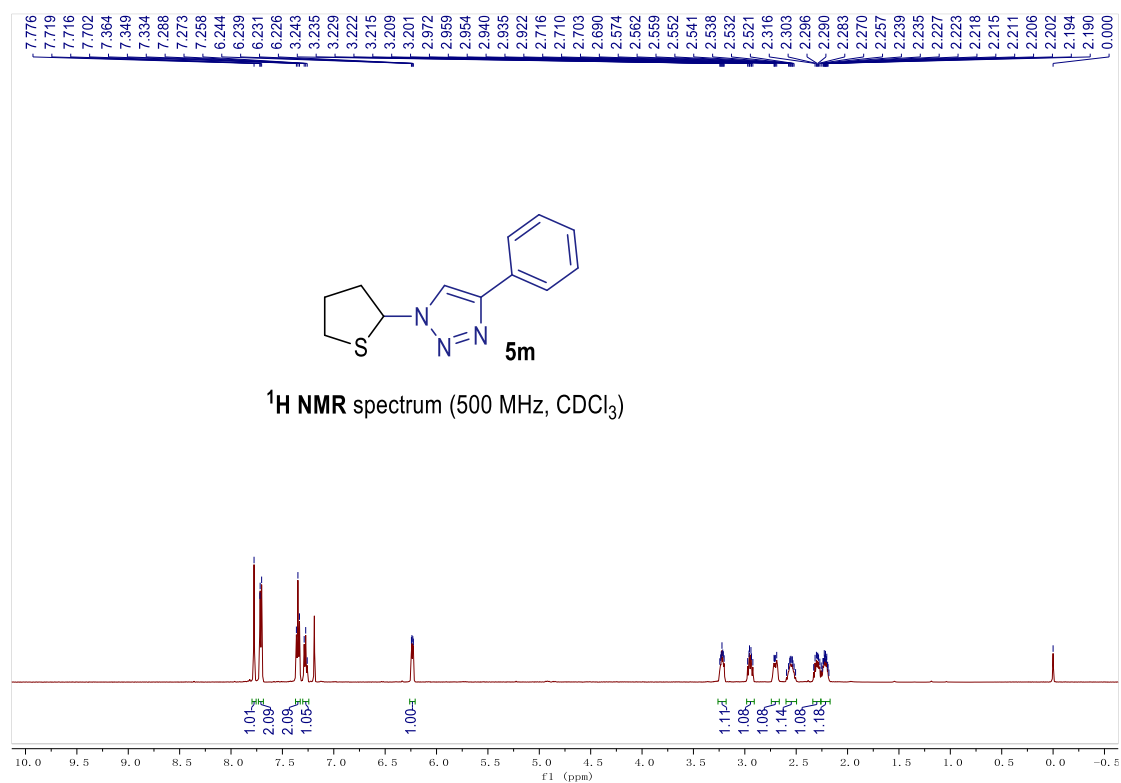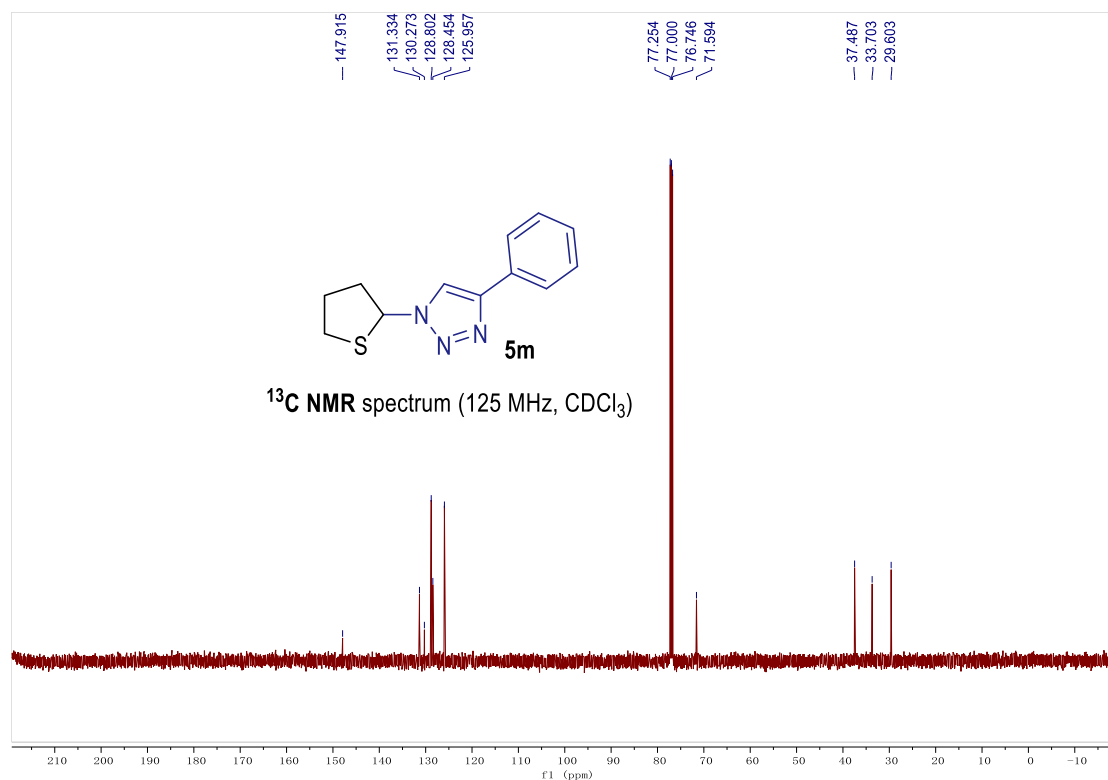

5n

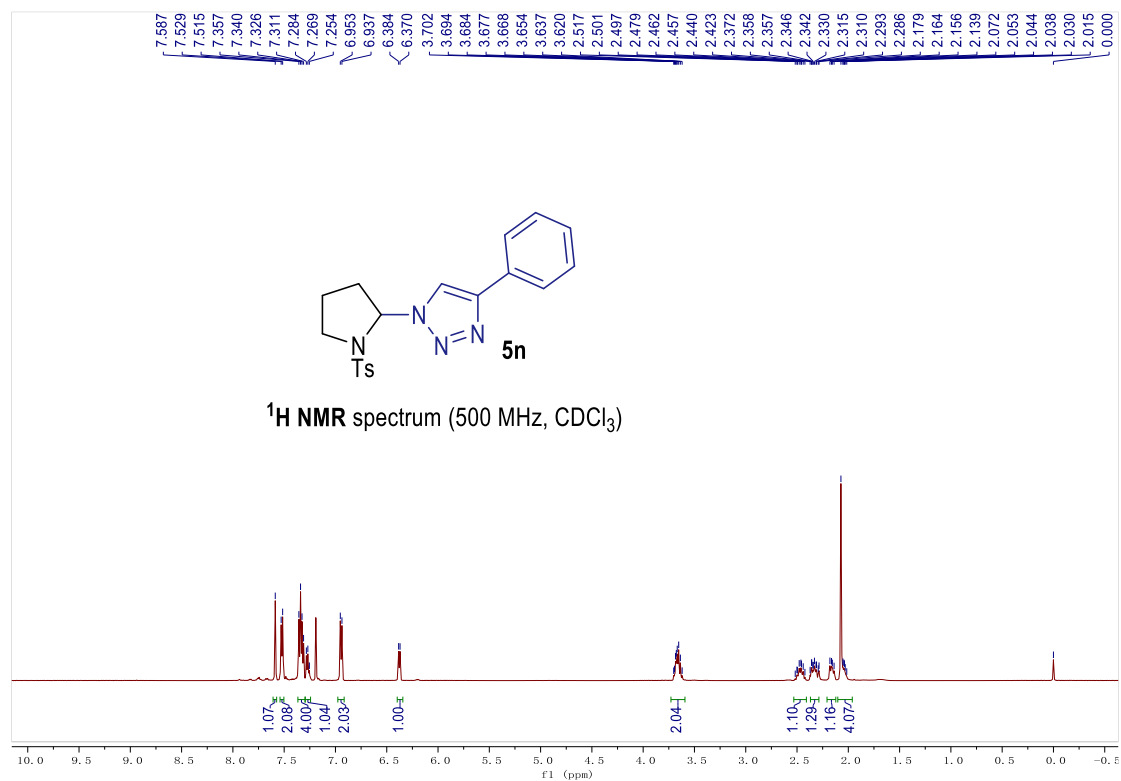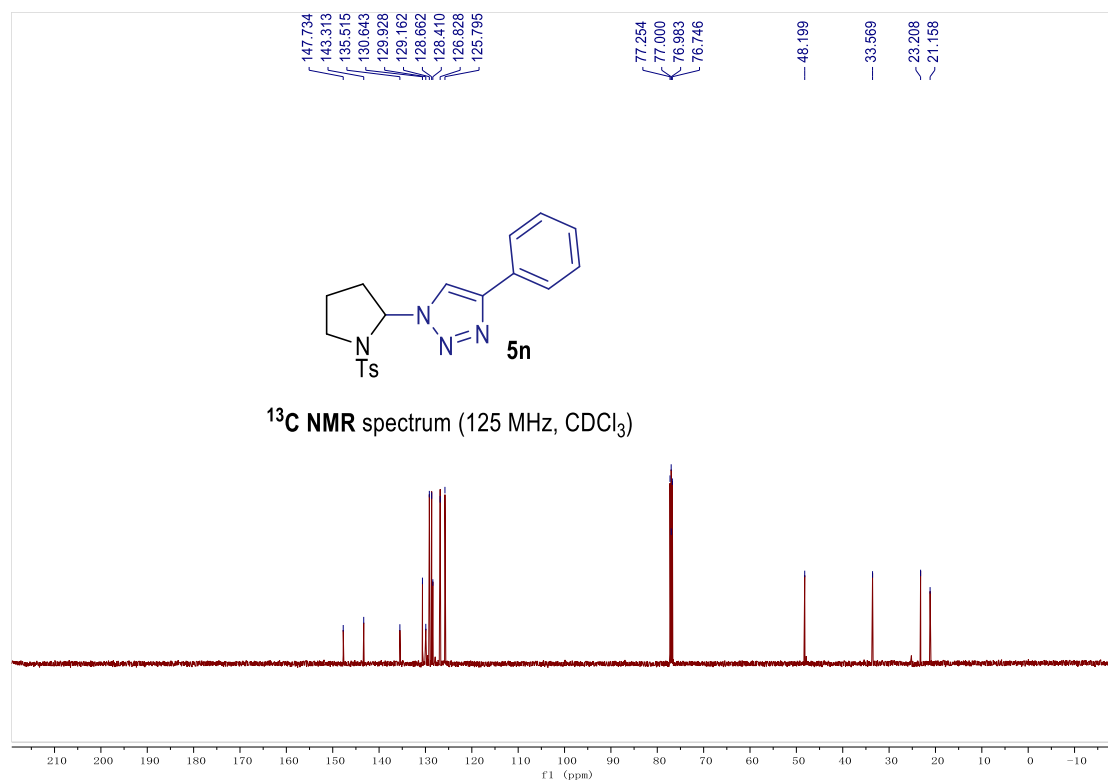

5o

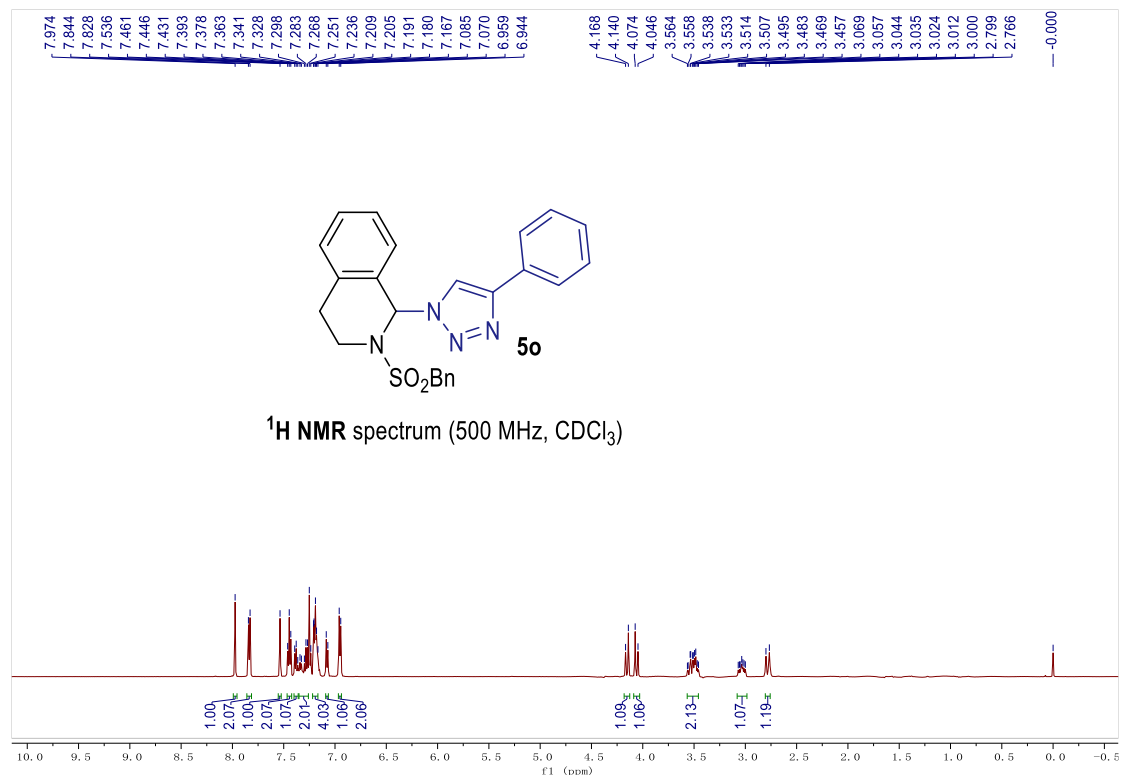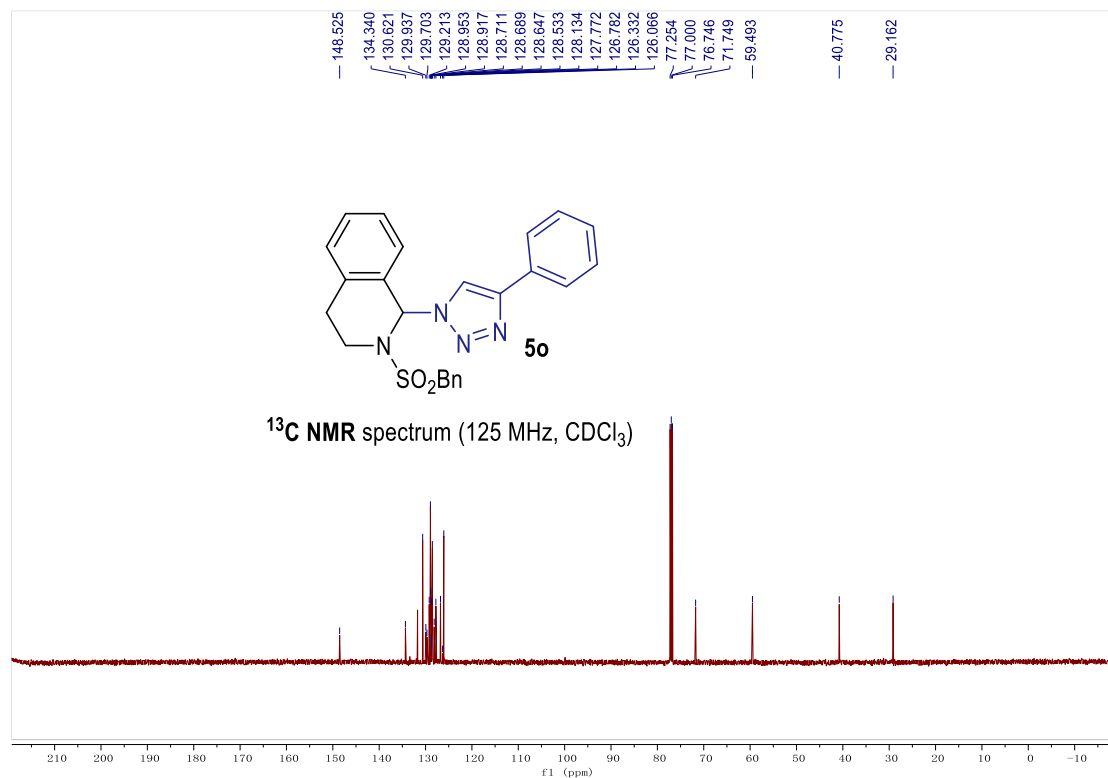

6

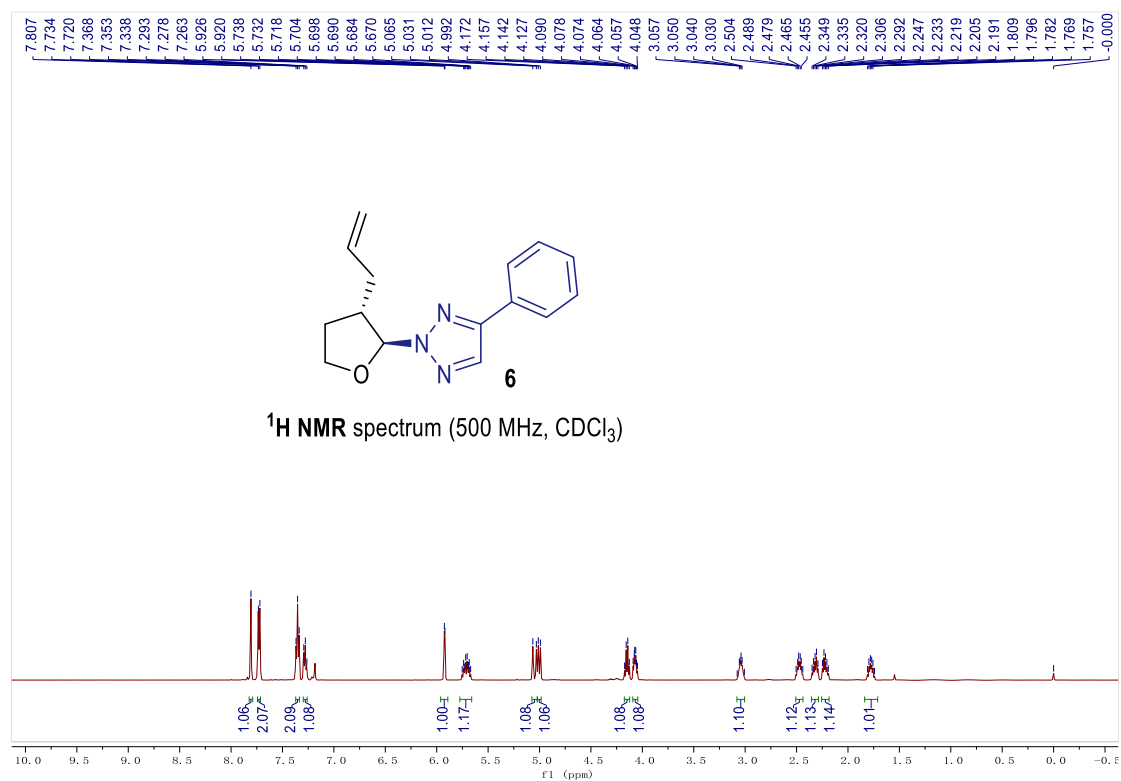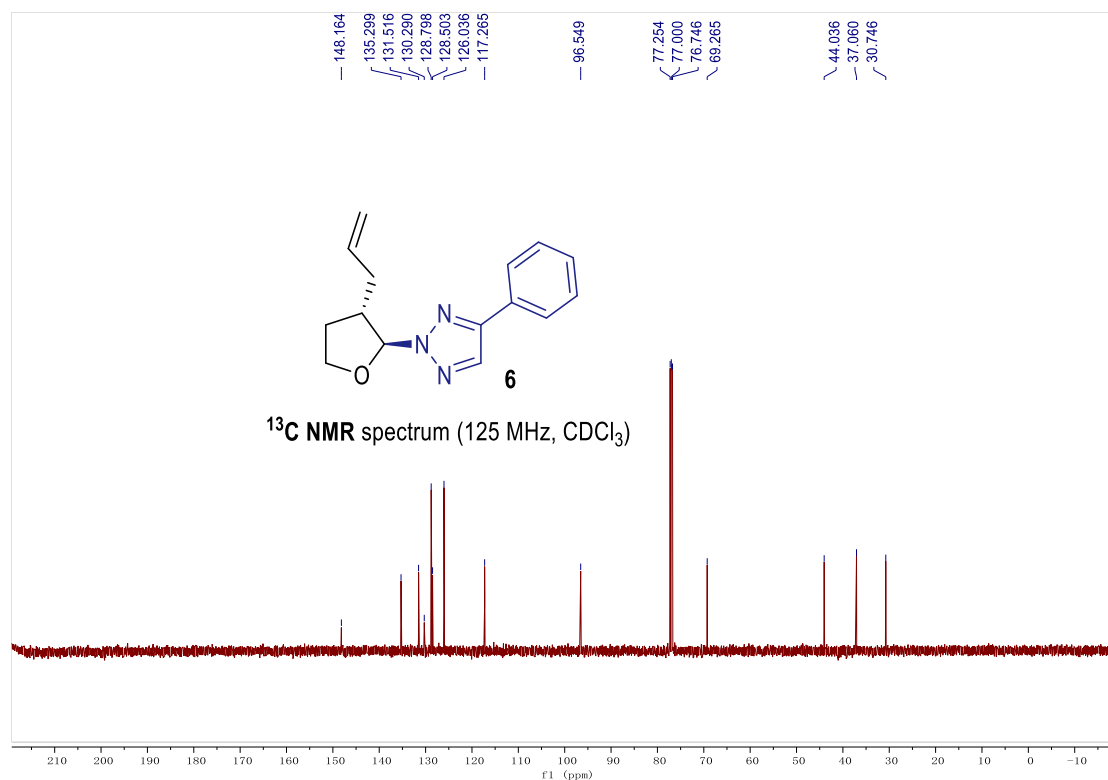

Supplement: d0qo01111h1.pdf [file d0qo01111h1.pdf]
